# Supplementary material for: Gram-negative synergy and mechanism of action of alkynyl bisbenzimidazoles
Source: PubMed Central journal article supplement (PMC6775084; doi:10.1038/s41598-019-48898-4), 2019-10-02
Supplement: 41598_2019_48898_MOESM1_ESM.pdf [file 41598_2019_48898_MOESM1_ESM.pdf]

Gram-negative synergy and mechanism of action of alkynyl bisbenzimidazoles.

Jordan Chamberlin<sup>1</sup>, Sandra Story<sup>2</sup>, Nihar Ranjan<sup>1#</sup>, Geoffrey Chesser<sup>1</sup>, Dev P. Arya<sup>1,2\*</sup>

<sup>1</sup> Department of Chemistry, Clemson University, Clemson, 29631, USA

<sup>2</sup> NUBAD LLC, Greenville, 29605, USA

<sup>1#</sup> National Institute of Pharmaceutical Education and Research (NIPER) Raebareli , Lucknow, Uttar Pradesh,  
India

\*Address correspondence to Dev P. Arya, [dparya@clemson.edu](mailto:dparya@clemson.edu)

## Supplemental Data

| Morphology                                    | Description                                              | Mechanism                                                                        | Phenotype                                                                           |
|-----------------------------------------------|----------------------------------------------------------|----------------------------------------------------------------------------------|-------------------------------------------------------------------------------------|
| Spheroplast<br>[Not Pictured]                 | Large, spherical, osmotically sensitive cells            | Inhibition of ribosomal synthesis of proteins related to peptidoglycan synthesis |                                                                                     |
| Filamentation (moderate)<br>[A]               | Moderate (1-1.6x) lengthening of bacterial cells         | Unknown mechanism.                                                               | 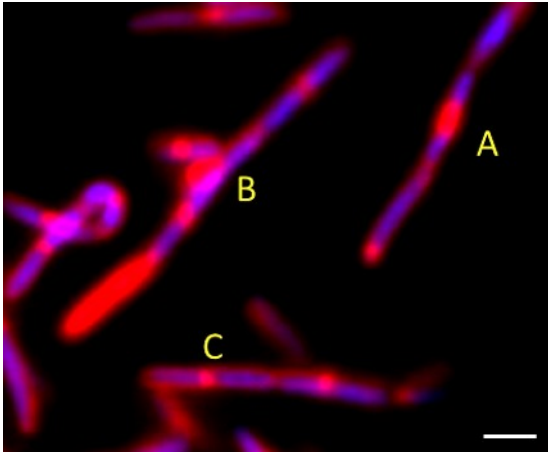 |
| Bulging<br>[B]                                | Localized Protrusion composed of all envelope components | Accumulation of peptidoglycan cross-links defects                                |                                                                                     |
| Peptidoglycan thickening (Gram + only)<br>[C] | Septal and peripheral peptidoglycan thickening           | Inhibition of synthesis of peptidoglycan hydrolases                              |                                                                                     |

Kanamycin

**Table S1.** Expected morphologies for bacteria treated with protein synthesis inhibitors.<sup>1-3</sup>  
Scale bar 1  $\mu$ M. Pictured is *B. subtilis*.

| Morphology                      | Description                                                       | Mechanism                                                                  | Phenotype |
|---------------------------------|-------------------------------------------------------------------|----------------------------------------------------------------------------|-----------|
| Spheroplast<br>[A]              | Large, spherical, osmotically active cells                        | loss of peptidoglycan layer by inhibition of PBP1a and 1b                  |           |
| Filamentation (long)<br>[B]     | Extensive lengthening of rod-shaped cells (>2x)                   | Unequal lengthening of lateral cell wall due to inhibition of PBP3         |           |
| Mid-section Swelling<br>[C]     | Localized bilateral swelling with retainment of osmotic stability | Simultaneous inhibition of PBP2 and PBP3                                   |           |
| Bulging<br>[Not Pictured]       | Localized unilateral swelling and are osmotically sensitive       | Accumulation of peptidoglycan cross-link defects leading to pore formation |           |
| Peptidoglycan Thickening<br>[D] | Septal and peripheral peptidoglycan thickening                    | Inhibition of synthesis of peptidoglycan hydrolases                        |           |
| Leakage / lysate<br>[E]         | Leaked cellular contents (DNA)                                    | Loss of cell integrity due to cell wall destruction                        |           |
| Ghost cells<br>[F]              | Empty cell envelopes staining completely red with FM4-64          | Various mechanisms including activation of lysis gene <i>E</i>             |           |

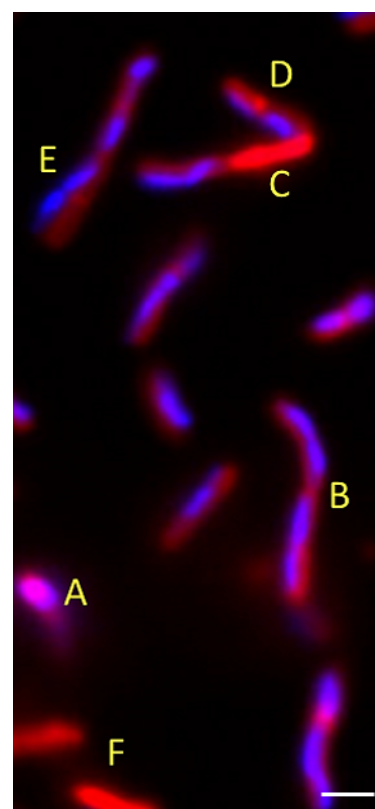

Ampicillin

**Table S2.** Expected morphologies for bacteria treated with cell wall synthesis inhibitors.<sup>2-5</sup>  
Scale bar 1  $\mu$ M. Pictured is *B. subtilis*.

| Morphology                         | Description                                              | Mechanism                                                                                      | Phenotype                                                                                                                                                                                                                                                                 |
|------------------------------------|----------------------------------------------------------|------------------------------------------------------------------------------------------------|---------------------------------------------------------------------------------------------------------------------------------------------------------------------------------------------------------------------------------------------------------------------------|
| Spheroplast<br>[A]                 | Large, spherical, osmotically sensitive cells            | Supra inhibitory concentrations inhibit RNA and protein synthesis, loss of peptidoglycan layer | 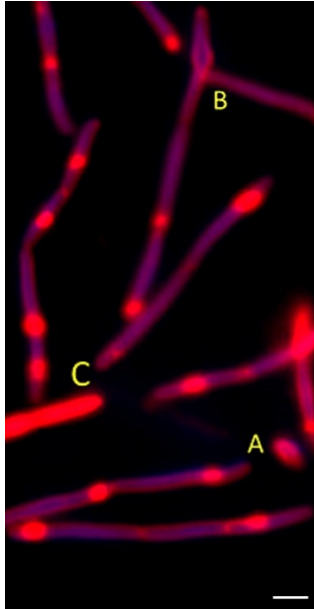 <p><b>Ciprofloxacin</b><br/><i>B. subtilis</i></p>  <p><b>Norofloxacin</b><br/><i>E. coli</i></p> |
| Filamentation (long)<br>[B]        | Extensive lengthening of rod-shaped cells (>2x)          | Induction of bacterial SOS response to DNA strand breakage                                     |                                                                                                                                                                                                                                                                           |
| Leakage / lysate<br>[Not Pictured] | Leaked cellular contents (DNA)                           | Loss of cell integrity due to cell wall destruction                                            |                                                                                                                                                                                                                                                                           |
| Ghost cells<br>[C]                 | Empty cell envelopes staining completely red with FM4-64 | Various mechanisms including activation of lysis gene <i>E</i>                                 |                                                                                                                                                                                                                                                                           |

**Table S3.** Expected morphologies for bacteria treated with DNA synthesis inhibitors.<sup>2, 5-7</sup> Pictured is *B. subtilis* (top) and *E. coli* (bottom). Scale bar 1  $\mu$ M.

| Morphology                      | Description                                              | Mechanism                                                                          | Phenotype |
|---------------------------------|----------------------------------------------------------|------------------------------------------------------------------------------------|-----------|
| Filamentation (moderate) [A]    | Moderate (1-1.6x) lengthening of bacterial cells         | Unproposed mechanism                                                               |           |
| Bulging [B]                     | Multiple localized unilateral protrusions                | Nondescript disturbance of peptidoglycan – cell membrane biosynthetic relationship |           |
| Leakage / lysate [Not Pictured] | Leaked cellular contents (DNA)                           | Loss of cell integrity due to cell wall destruction                                |           |
| Ghost cells [C]                 | Empty cell envelopes staining completely red with FM4-64 | Various mechanisms including activation of lysis gene <i>E</i>                     |           |

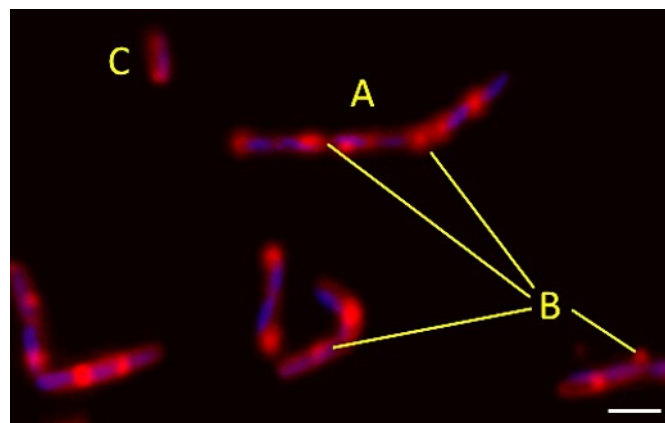

Rifampicin

**Table S4.** Expected morphologies for bacteria treated with RNA synthesis inhibitors.<sup>2, 5, 8</sup>  
Scale bar 1  $\mu$ M. Pictured is *B. subtilis*.

| <b>Morphology</b>                  | <b>Description</b>                                                 | <b>Mechanism</b>                                                                                                          | <b>Phenotype</b>                                                                                                                  |
|------------------------------------|--------------------------------------------------------------------|---------------------------------------------------------------------------------------------------------------------------|-----------------------------------------------------------------------------------------------------------------------------------|
| Filamentation<br>(Moderate)<br>[A] | Moderate<br>(1-1.6x) lengthening<br>of bacterial cells             | Unproposed<br>mechanism                                                                                                   |                                                                                                                                   |
| Bulging<br>[Not Pictured]          | Multiple localized<br>unilateral protrusions                       | Chemical<br>intercalation of<br>membrane disruptor<br>causes local<br>mechanical increase<br>in membrane surface<br>area. |                                                                                                                                   |
| Leakage/ lysate<br>[B]             | Leaked cellular<br>contents, breakdown<br>of membrane<br>integrity | Destruction of outer<br>membrane integrity<br>by binding to lipids<br>etc.                                                | 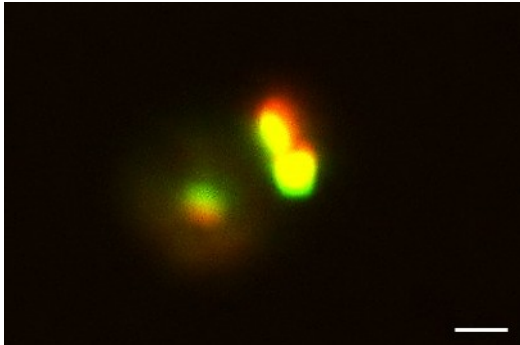 <p><b>Polymyxin B</b><br/><b>[E. coli]</b></p> |

**Table S5.** Expected morphologies for bacteria treated with membrane-active agents.<sup>2, 9</sup>  
Scale bar 1  $\mu$ M. Pictured is *B. subtilis*.

**Antibiotics for use in Cytological profiling**

| <b>Antibiotic</b> | <b>Mechanism of action</b> <sup>10-12</sup>                      |
|-------------------|------------------------------------------------------------------|
| Vancomycin        | Cell wall synthesis; D-Ala-D-Ala binding                         |
| Ampicillin        | Cell wall synthesis; PBPs                                        |
| Ciprofloxacin     | DNA Synthesis; DNA gyrase                                        |
| Nalidixic acid    | DNA Synthesis; DNA gyrase                                        |
| Tobramycin        | Protein synthesis; mistranslation                                |
| Neomycin          | Protein synthesis; mistranslation                                |
| Kanamycin         | Protein synthesis; mistranslation                                |
| Linezolid         | Protein synthesis; Initiation complex formation inhibition       |
| Tetracycline      | Protein synthesis; tRNA binding                                  |
| Rifampicin        | RNA synthesis; DNA-dependent transcription                       |
| Nisin             | Membrane-active; Lipid II binding and pore formation.            |
| Polymyxin B       | Membrane active; LPS binding and membrane integrity destruction. |

**Table S6.** Antibiotics used in cytological profiling in this study. Compounds are representative of the five major inhibitory classes (DNA synthesis, RNA synthesis, protein synthesis, cell wall synthesis, membrane-active compounds). Alternative antibiotics have been described in *Nonejuie et al.*<sup>13</sup>

*Escherichia coli*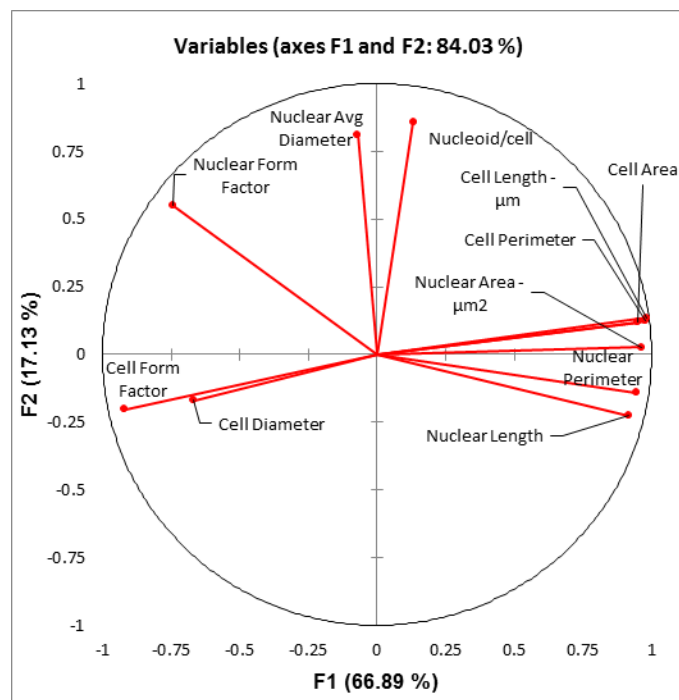

**Figure S1.** Variable Axes chart representing correlations between variables and principal components from this compound library treated *E. coli*.

|                                      | F1     | F2     | F3     |
|--------------------------------------|--------|--------|--------|
| Cell Area - $\mu\text{m}^2$          | 12.264 | 0.754  | 1.675  |
| Cell Diameter - $\mu\text{m}$        | 6.061  | 1.539  | 39.690 |
| Cell Form Factor                     | 11.506 | 2.163  | 4.880  |
| Cell Length - $\mu\text{m}$          | 13.120 | 0.987  | 0.011  |
| Cell Perimeter - $\mu\text{m}$       | 12.992 | 0.812  | 0.773  |
| Nuclear Area - $\mu\text{m}^2$       | 12.654 | 0.035  | 4.267  |
| Nuclear Avg Diameter - $\mu\text{m}$ | 0.066  | 34.927 | 27.704 |
| Nucleoid/cell                        | 0.234  | 39.025 | 6.096  |
| Nuclear Form Factor                  | 7.478  | 15.995 | 0.255  |
| Nuclear Length - $\mu\text{m}$       | 11.476 | 2.701  | 7.472  |
| Nuclear Perimeter - $\mu\text{m}$    | 12.151 | 1.063  | 7.176  |

**Table S7.** Percent contributions of each variable from this compound library for *E. coli*.



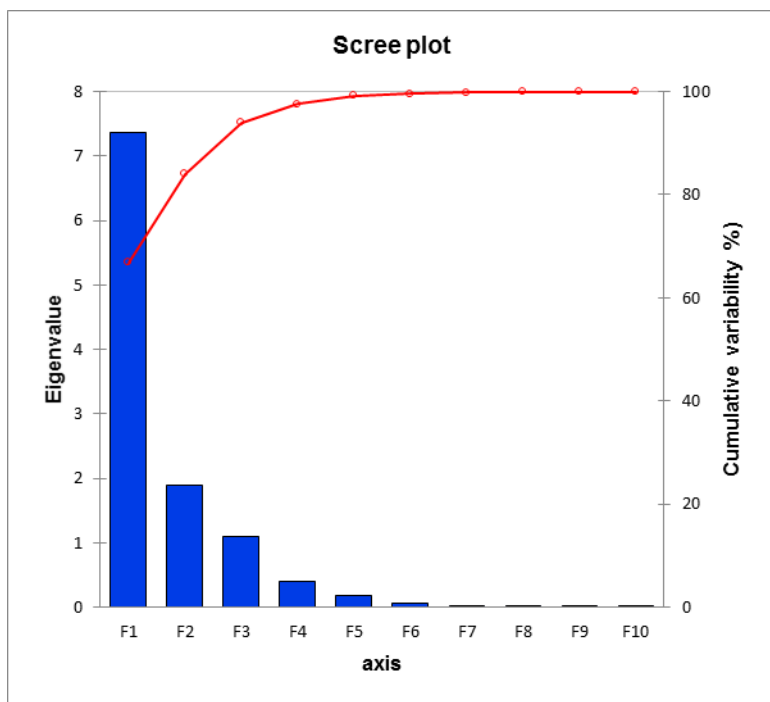

**Figure S2.** Scree plot of eigenvalue and cumulative variability of all principal components for this compound library for *E. coli*.

*B. subtilis*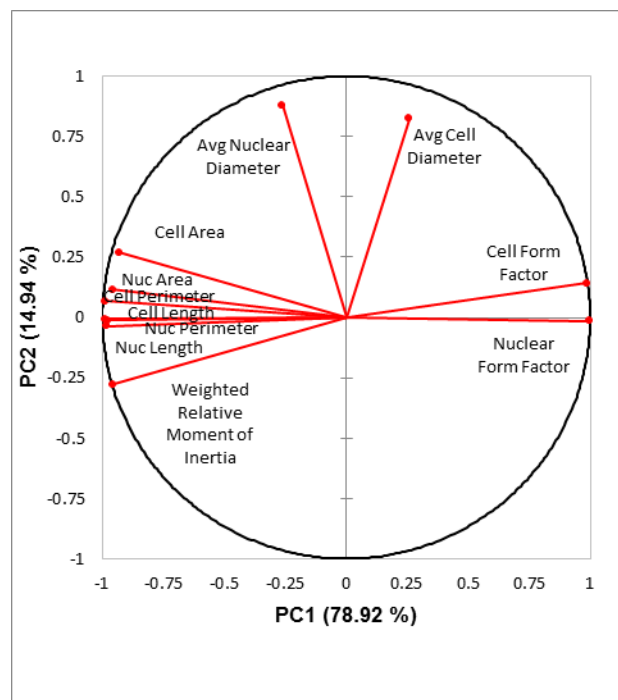

**Figure S3.** Variable Axes chart representing correlations between variables and principal components from this compound library treated *B. subtilis*.

|                                      | PC1    | PC2    | PC3    |
|--------------------------------------|--------|--------|--------|
| Cell Area - $\mu\text{m}^2$          | 10.032 | 4.398  | 7.912  |
| Cell Avg Diameter - $\mu\text{m}$    | 0.796  | 47.036 | 25.833 |
| Cell Form Factor                     | 11.171 | 1.229  | 0.352  |
| Cell Length - $\mu\text{m}$          | 11.317 | 0.003  | 1.748  |
| Cell Perimeter - $\mu\text{m}$       | 11.218 | 0.275  | 2.664  |
| Weighted Relative Moment of Inertia  | 10.527 | 4.715  | 0.811  |
| Nuclear Area - $\mu\text{m}^2$       | 10.593 | 0.824  | 9.199  |
| Nuclear Avg Diameter - $\mu\text{m}$ | 0.770  | 41.419 | 42.870 |
| Nuclear Form Factor                  | 11.407 | 0.013  | 0.030  |
| Nuclear Length - $\mu\text{m}$       | 11.130 | 0.079  | 3.628  |
| Nuclear Perimeter - $\mu\text{m}$    | 11.038 | 0.010  | 4.954  |

**Table S8.** Percent contributions of each variable from this compound library for *B. subtilis*.

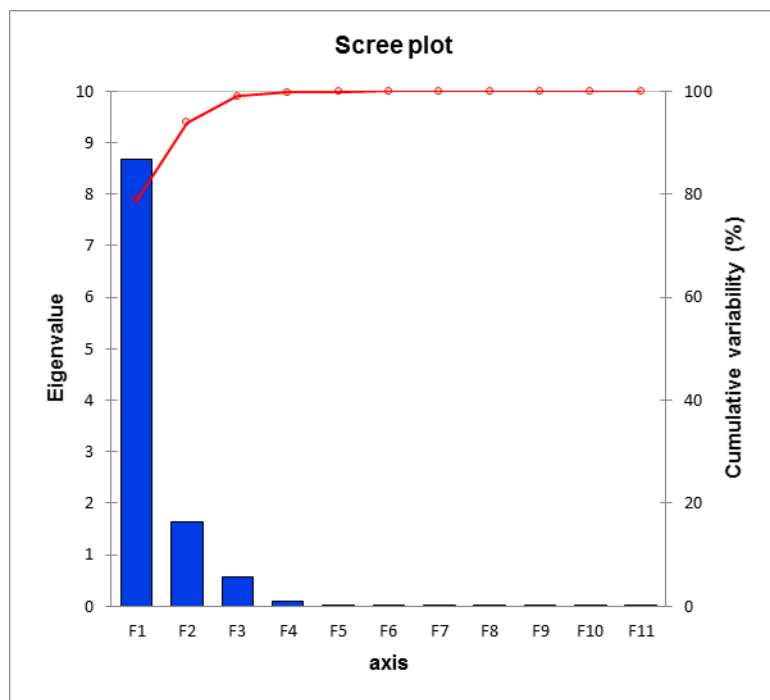

**Figure S4.** Scree plot of eigenvalue and cumulative variability of all principal components for this compound library *B. subtilis*.

| <b>Measurement</b>                         | <b>Parameters</b>                                                                                                                                                                                                                                                                         |
|--------------------------------------------|-------------------------------------------------------------------------------------------------------------------------------------------------------------------------------------------------------------------------------------------------------------------------------------------|
| <b>Area</b>                                | Calculated area by counting pixels inside target outline borders. Pixels belonging to the border itself are not included.                                                                                                                                                                 |
| <b>Average Diameter</b>                    | Mean internal distance perpendicular to the curved chord.                                                                                                                                                                                                                                 |
| <b>Count</b>                               | The number of targets contained within the region of interest.                                                                                                                                                                                                                            |
| <b>Form Factor</b>                         | Standard estimate of circularity that relates perimeter length to area. The more convoluted (and longer) the perimeter, the less circular the target. Varies from 0 to 1, with 1 being a perfect circle.                                                                                  |
| <b>Length</b>                              | Length is the maximum distance across a target and it is a measurement that is allowed to cross target boundaries. In an S-shaped target, length is the straight line distance from tip to tip of the S.                                                                                  |
| <b>Perimeter</b>                           | Length of target's outer boundary. Local, curvature-sensitive smoothing used during perimeter calculation with IN Cell developer Toolbox reduces excess smoothing due to artifacts.                                                                                                       |
| <b>Weighted Relative Moment Of inertia</b> | Index of the homogeneity of gray levels within a circular target. A value of 1 indicates the target is relatively homogeneous. If >1, the target has a higher proportion of bright pixels in its center. If <1, the target has a higher proportion of bright pixels around its perimeter. |
| <b>Density</b>                             | Mean density value of the pixels contained within the target outline. <b>Levels</b> – Gray Levels. Uncalibrated intensity unit for IN Cell images, the higher the value, the brighter the pixel.                                                                                          |
| <b>DxA</b>                                 | Density x Area. Mean density (in current density unit) within the target outline multiplied by its area. Estimates total signal intensity associated with a given target.                                                                                                                 |
| <b>Permeable Cells</b>                     | Defined as sum count of green cells divided by sum count of all cells                                                                                                                                                                                                                     |

**Table S9.** Parameters for measurements recorded in cytological profiling and methods for replication.

*B. subtilis*

|                | Area -<br>$\mu\text{m}^2$ | Diameter -<br>$\mu\text{m}$ | Form<br>Factor | Length -<br>$\mu\text{m}$ | Perimeter -<br>$\mu\text{m}$ |
|----------------|---------------------------|-----------------------------|----------------|---------------------------|------------------------------|
| DPA154         | 5.091                     | 1.57                        | 0.861          | 3.467                     | 8.445                        |
| DPA156         | 5.417                     | 1.624                       | 0.869          | 3.556                     | 8.73                         |
| Ampicillin     | 6.927                     | 1.538                       | 0.72           | 5.074                     | 11.903                       |
| Ciprofloxacin  | 7.973                     | 1.361                       | 0.694          | 6.098                     | 14.007                       |
| Kanamycin      | 9.253                     | 1.505                       | 0.661          | 6.553                     | 15.284                       |
| Linezolid      | 7.533                     | 1.568                       | 0.707          | 5.278                     | 12.329                       |
| Nalidixic Acid | 8.829                     | 1.402                       | 0.638          | 6.83                      | 15.626                       |
| Neomycin       | 8.621                     | 1.504                       | 0.651          | 6.289                     | 14.58                        |
| Nisin          | 4.076                     | 1.589                       | 0.924          | 2.88                      | 7.256                        |
| Polymyxin B    | 5.763                     | 1.677                       | 0.843          | 3.825                     | 9.345                        |
| Rifampicin     | 7.281                     | 1.589                       | 0.709          | 5.167                     | 12.104                       |
| Tetracycline   | 7.299                     | 1.501                       | 0.713          | 5.213                     | 12.203                       |
| Tobramycin     | 7.211                     | 1.514                       | 0.704          | 5.2                       | 12.187                       |
| Vancomycin     | 7.047                     | 1.577                       | 0.719          | 5.066                     | 11.817                       |
| Untreated      | 1.076                     | 1.372                       | 0.963          | 1.447                     | 3.681                        |

**Table S10. Cell morphology parameters used for PCA and AHC**

|                | Area -<br>$\mu\text{m}^2$ | Diameter -<br>$\mu\text{m}$ | Form<br>Factor | Length -<br>$\mu\text{m}$ | Perimeter -<br>$\mu\text{m}$ |
|----------------|---------------------------|-----------------------------|----------------|---------------------------|------------------------------|
| DPA154         | 1.139                     | 0.695                       | 0.911          | 1.592                     | 3.868                        |
| DPA156         | 1.15                      | 0.708                       | 0.949          | 1.436                     | 3.568                        |
| Ampicillin     | 1.864                     | 0.785                       | 0.761          | 2.571                     | 5.729                        |
| Ciprofloxacin  | 1.515                     | 0.415                       | 0.626          | 2.871                     | 5.974                        |
| Kanamycin      | 2.015                     | 0.548                       | 0.609          | 3.226                     | 6.835                        |
| Linezolid      | 1.795                     | 0.637                       | 0.721          | 2.649                     | 5.785                        |
| Nalidixic Acid | 1.746                     | 0.442                       | 0.582          | 3.146                     | 6.557                        |
| Neomycin       | 2.104                     | 0.593                       | 0.623          | 3.231                     | 6.861                        |
| Nisin          | 0.47                      | 0.416                       | 0.971          | 0.991                     | 2.394                        |
| Polymyxin B    | 0.639                     | 0.431                       | 0.873          | 1.307                     | 3.007                        |
| Rifampicin     | 1.925                     | 0.64                        | 0.694          | 2.84                      | 6.214                        |
| Tetracycline   | 1.873                     | 0.61                        | 0.681          | 2.823                     | 6.114                        |
| Tobramycin     | 1.872                     | 0.614                       | 0.689          | 2.805                     | 6.086                        |
| Vancomycin     | 1.85                      | 0.68                        | 0.72           | 2.676                     | 5.888                        |
| Untreated      | 0.384                     | 0.365                       | 1.012          | 0.896                     | 2.127                        |

**Table S11. DNA Morphology parameters used for PCA and AHC.**

*E. coli*

|                | Area -<br>$\mu\text{m}^2$ | Diameter -<br>$\mu\text{m}$ | Form<br>Factor | Length -<br>$\mu\text{m}$ | Perimeter<br>- $\mu\text{m}$ |
|----------------|---------------------------|-----------------------------|----------------|---------------------------|------------------------------|
| DPA 154        | 4.305                     | 1.262                       | 0.683          | 3.989                     | 9.112                        |
| DPA 156        | 3.806                     | 1.373                       | 0.804          | 3.306                     | 7.775                        |
| Ampicillin     | 7.892                     | 1.164                       | 0.492          | 7.911                     | 17.046                       |
| Ciprofloxacin  | 3.737                     | 1.322                       | 0.770          | 3.391                     | 8.066                        |
| Kanamycin      | 4.160                     | 1.170                       | 0.669          | 4.030                     | 9.231                        |
| Linezolid      | 3.879                     | 1.242                       | 0.725          | 3.658                     | 8.411                        |
| Nalidixic Acid | 6.742                     | 1.179                       | 0.478          | 6.590                     | 14.323                       |
| Neomycin       | 3.902                     | 1.166                       | 0.694          | 3.789                     | 8.686                        |
| Nisin          | 3.937                     | 1.258                       | 0.728          | 3.674                     | 8.459                        |
| Polymyxin-B    | 2.548                     | 1.296                       | 0.897          | 2.402                     | 5.944                        |
| Rifampicin     | 4.226                     | 1.245                       | 0.678          | 4.039                     | 9.142                        |
| Tetracycline   | 3.822                     | 1.254                       | 0.745          | 3.542                     | 8.255                        |
| Tobramycin     | 3.735                     | 1.247                       | 0.718          | 3.578                     | 8.308                        |
| Vancomycin     | 4.291                     | 1.266                       | 0.690          | 4.018                     | 9.114                        |
| Untreated      | 4.120                     | 1.226                       | 0.678          | 4.000                     | 9.129                        |

**Table S12. Cell morphology parameters used for PCA and AHC.**

|                | Area - $\mu\text{m}^2$ | Diameter -<br>$\mu\text{m}$ | Form<br>Factor | Length -<br>$\mu\text{m}$ | Perimeter -<br>$\mu\text{m}$ |
|----------------|------------------------|-----------------------------|----------------|---------------------------|------------------------------|
| DPA 154        | 3.163                  | 1.187                       | 0.745          | 3.215                     | 7.526                        |
| DPA 156        | 3.302                  | 1.275                       | 0.788          | 3.060                     | 7.431                        |
| Ampicillin     | 9.336                  | 1.171                       | 0.407          | 9.020                     | 19.083                       |
| Ciprofloxacin  | 3.200                  | 1.223                       | 0.781          | 3.113                     | 7.320                        |
| Kanamycin      | 3.739                  | 1.210                       | 0.718          | 3.605                     | 8.267                        |
| Linezolid      | 3.496                  | 1.254                       | 0.769          | 3.344                     | 7.675                        |
| Nalidixic Acid | 6.265                  | 1.209                       | 0.518          | 6.107                     | 13.168                       |
| Neomycin       | 3.650                  | 1.234                       | 0.741          | 3.514                     | 8.039                        |
| Nisin          | 3.889                  | 1.254                       | 0.722          | 3.678                     | 8.409                        |
| Polymyxin-B    | 2.374                  | 0.948                       | 0.704          | 2.913                     | 6.569                        |
| Rifampicin     | 4.066                  | 1.261                       | 0.721          | 3.777                     | 8.598                        |
| Tetracycline   | 3.516                  | 1.256                       | 0.771          | 3.297                     | 7.691                        |
| Tobramycin     | 3.579                  | 1.239                       | 0.754          | 3.375                     | 7.998                        |
| Vancomycin     | 4.020                  | 1.289                       | 0.736          | 3.691                     | 8.439                        |
| Untreated      | 3.757                  | 1.190                       | 0.713          | 3.696                     | 8.365                        |

**Table S13. Cell morphology parameters used for PCA and AHC.**

|                  | <b>B. subtilis</b> | <b>E. coli</b> |
|------------------|--------------------|----------------|
| <b>TET</b>       | 4261               | 550            |
| <b>CIP</b>       | 5008               | 214            |
| <b>KAN</b>       | 4585               | 518            |
| <b>NAL</b>       | 5157               | 302            |
| <b>AMK</b>       | 4260               | 501            |
| <b>RIF</b>       | 2874               | 1221           |
| <b>NEO</b>       | 3644               | 507            |
| <b>AMP</b>       | 1414               | 196            |
| <b>TOB</b>       | 3200               | 239            |
| <b>VAN</b>       | 1699               | 987            |
| <b>LZD</b>       | 2623               | 426            |
| <b>PMB</b>       | 1304               | 106            |
| <b>Nisin</b>     | 2991               | 1293           |
| <b>Untreated</b> | 1018               | 633            |
| <b>DPA 154</b>   | 2490               | 318            |
| <b>DPA 156</b>   | 1715               | 350            |

**Table S14.** Total count of bacteria used for cytological profiling studies.

*B. subtilis* composite images

Ampicillin

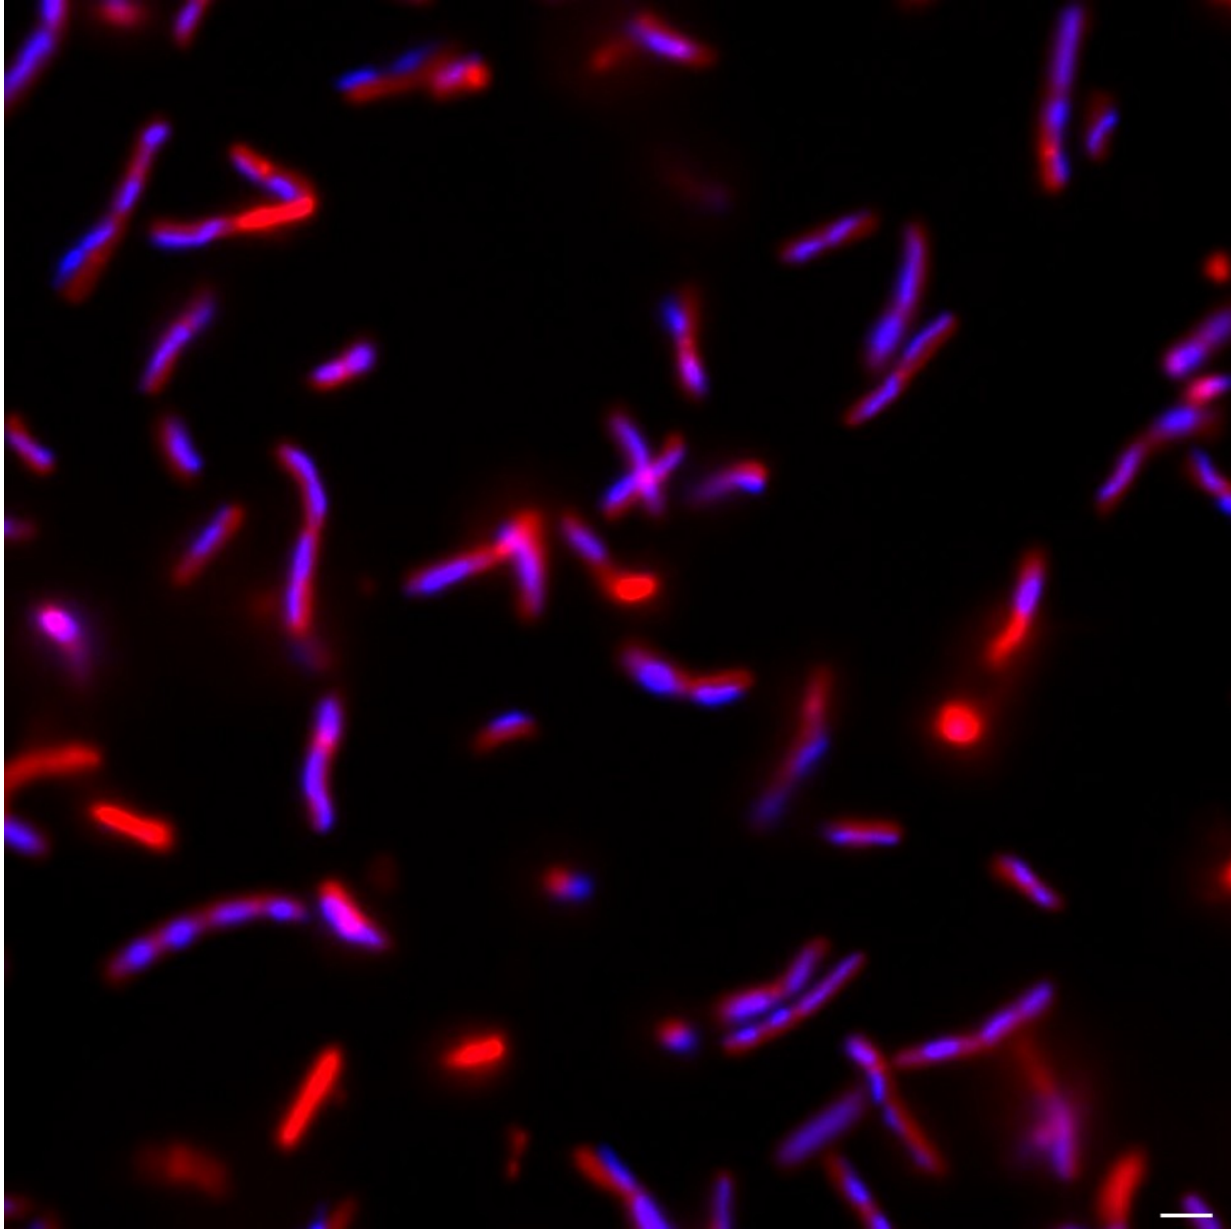

**Figure S5.** Cytological profile of Ampicillin-treated *B. subtilis* treated with DAPI (blue) and FM464 (Red). Corresponding analysis of expected and observed cytological profiles are discussed in the main manuscript. Scale bar 1  $\mu$ M.



**Vancomycin**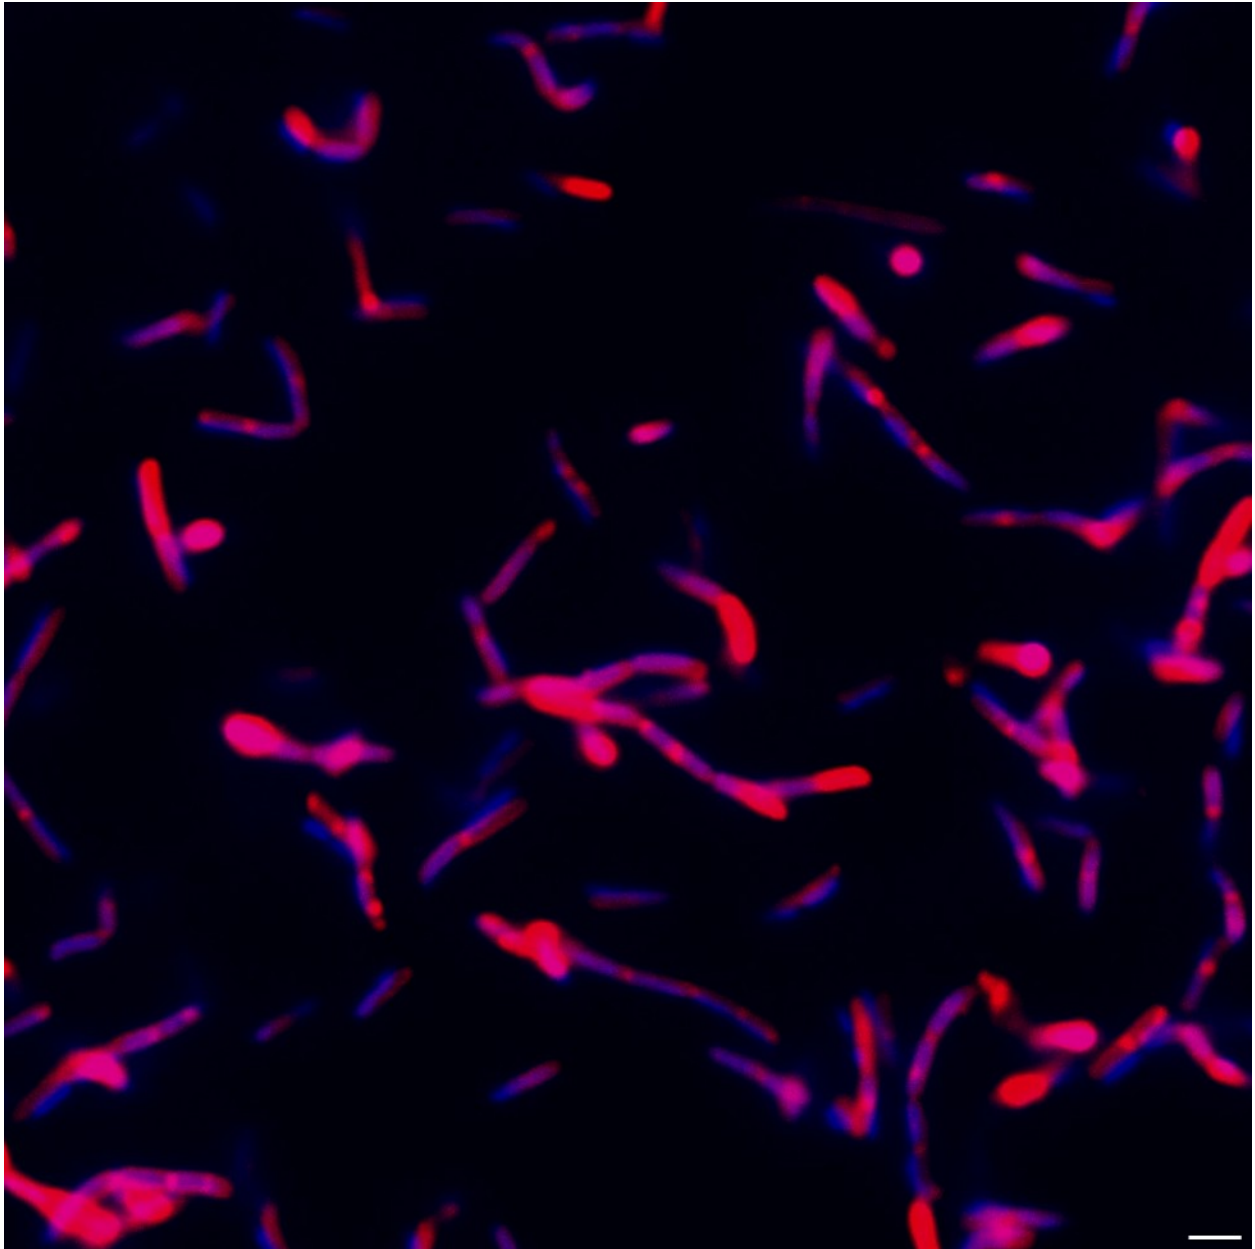

**Figure S6.** Cytological profile of vancomycin-treated *B. subtilis* treated with DAPI (blue) and FM464 (Red). Corresponding analysis of expected and observed cytological profiles are discussed in the main manuscript. Scale bar 1  $\mu$ M.

## Ciprofloxacin

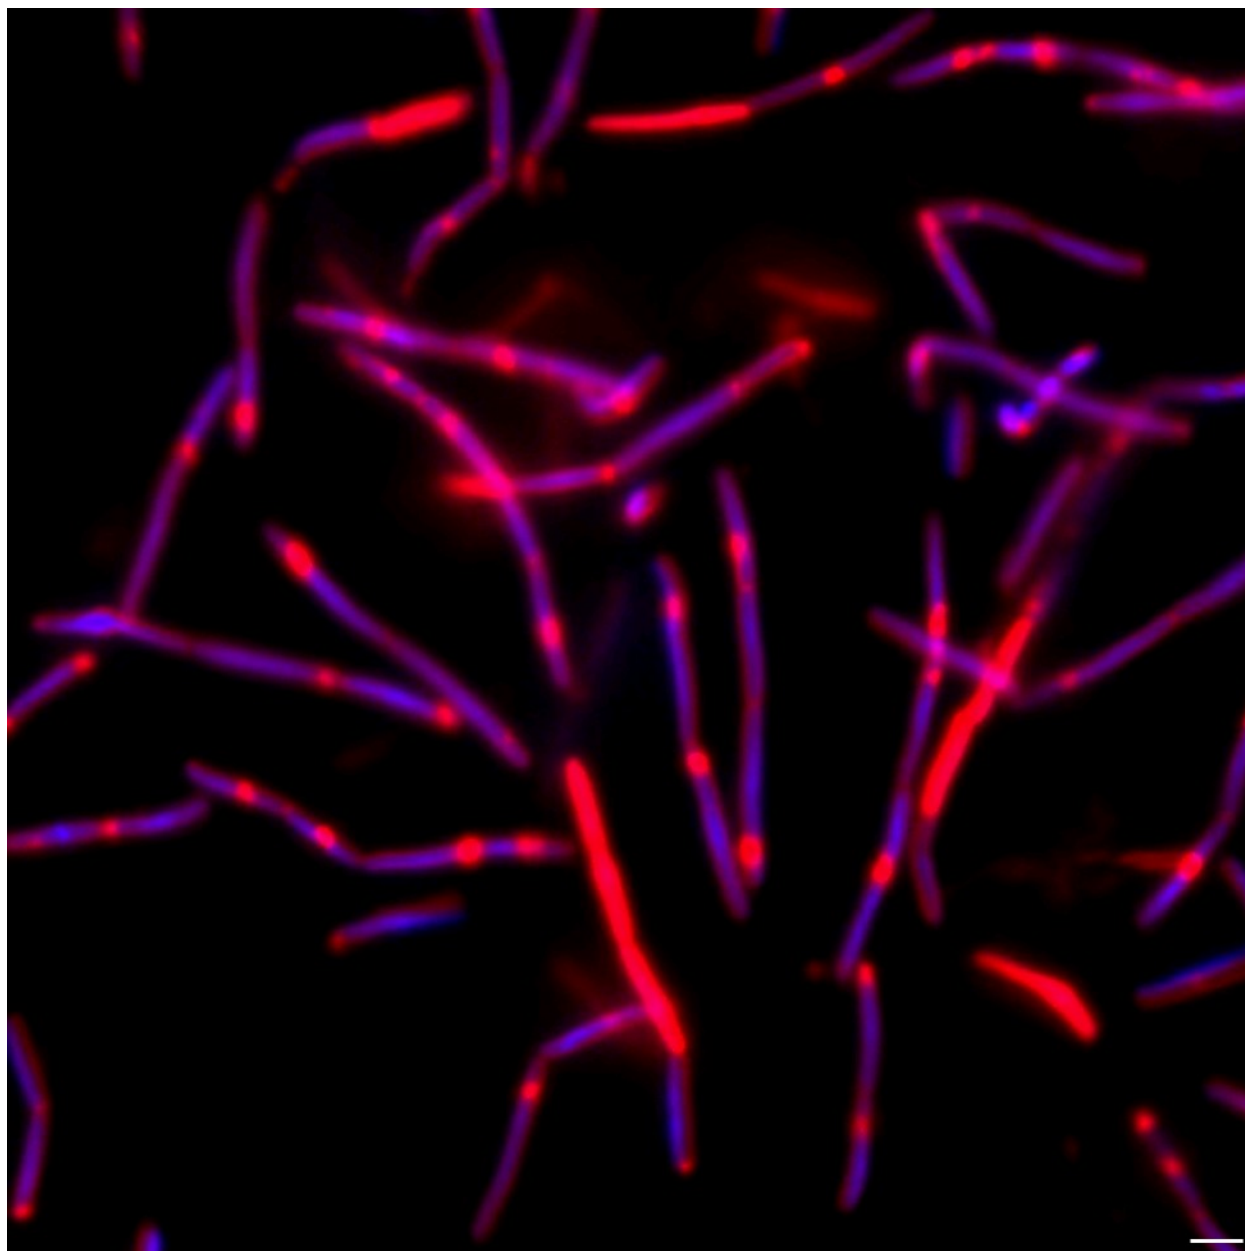

**Figure S7.** Cytological profile of Ciprofloxacin-treated *B. subtilis* treated with DAPI (blue) and FM464 (Red). Corresponding analysis of expected and observed cytological profiles are discussed in the main manuscript. Scale bar 1  $\mu$ M.

**Nalidixic acid**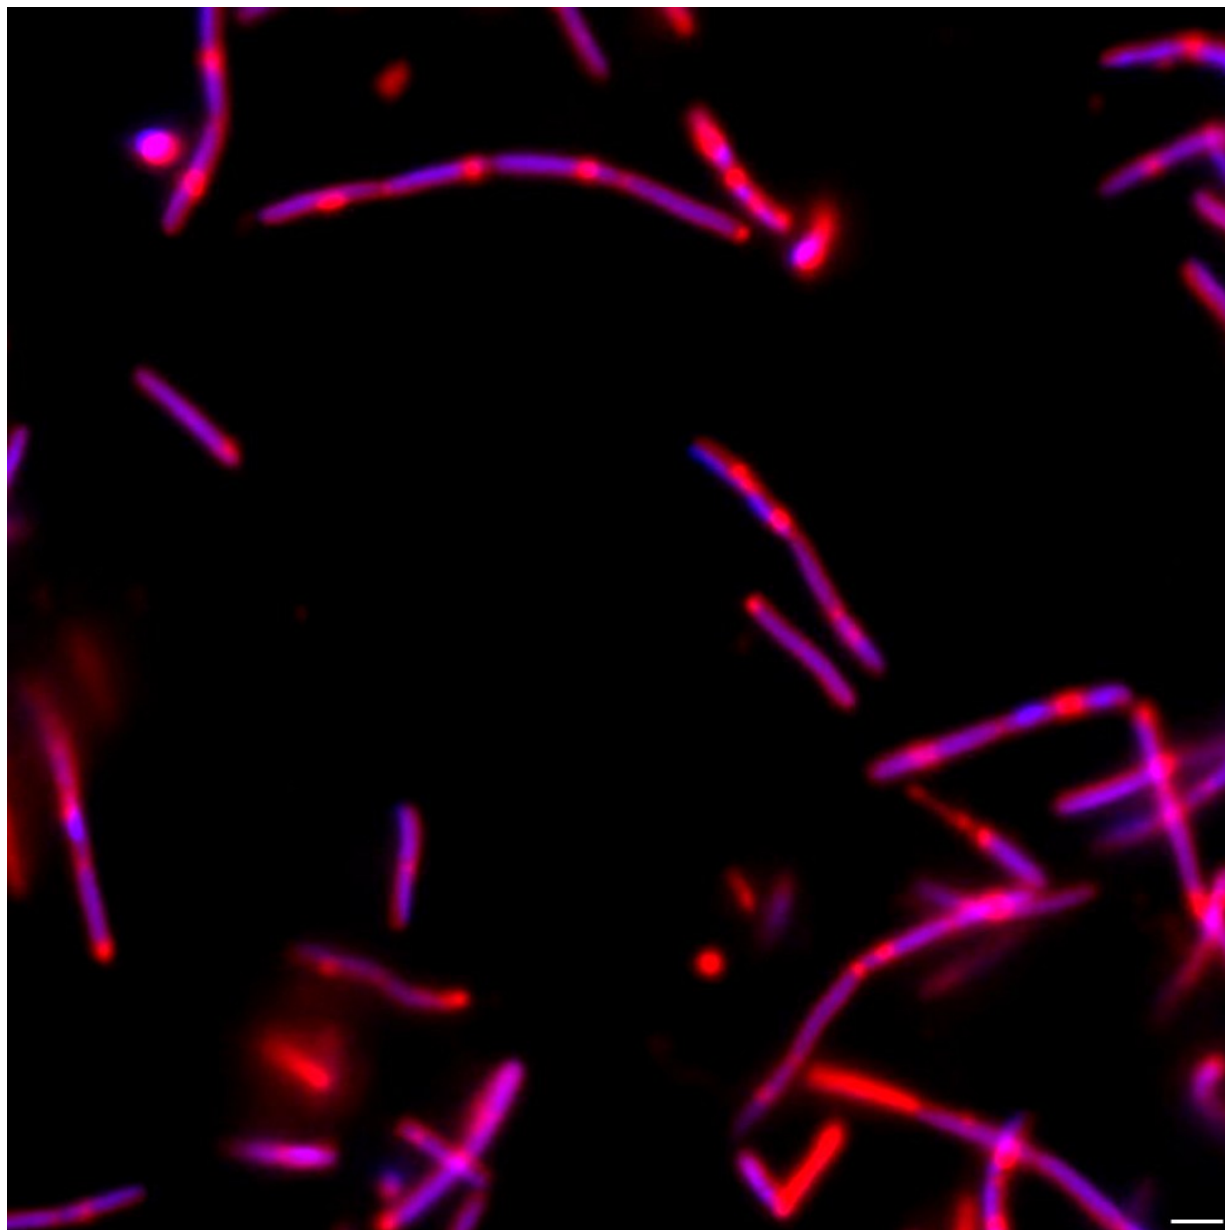

**Figure S8.** Cytological profile of Nalidixic acid-treated *B. subtilis* treated with DAPI (blue) and FM464 (Red). Corresponding analysis of expected and observed cytological profiles are discussed in the main manuscript. Scale bar 1  $\mu$ M.

**Tobramycin**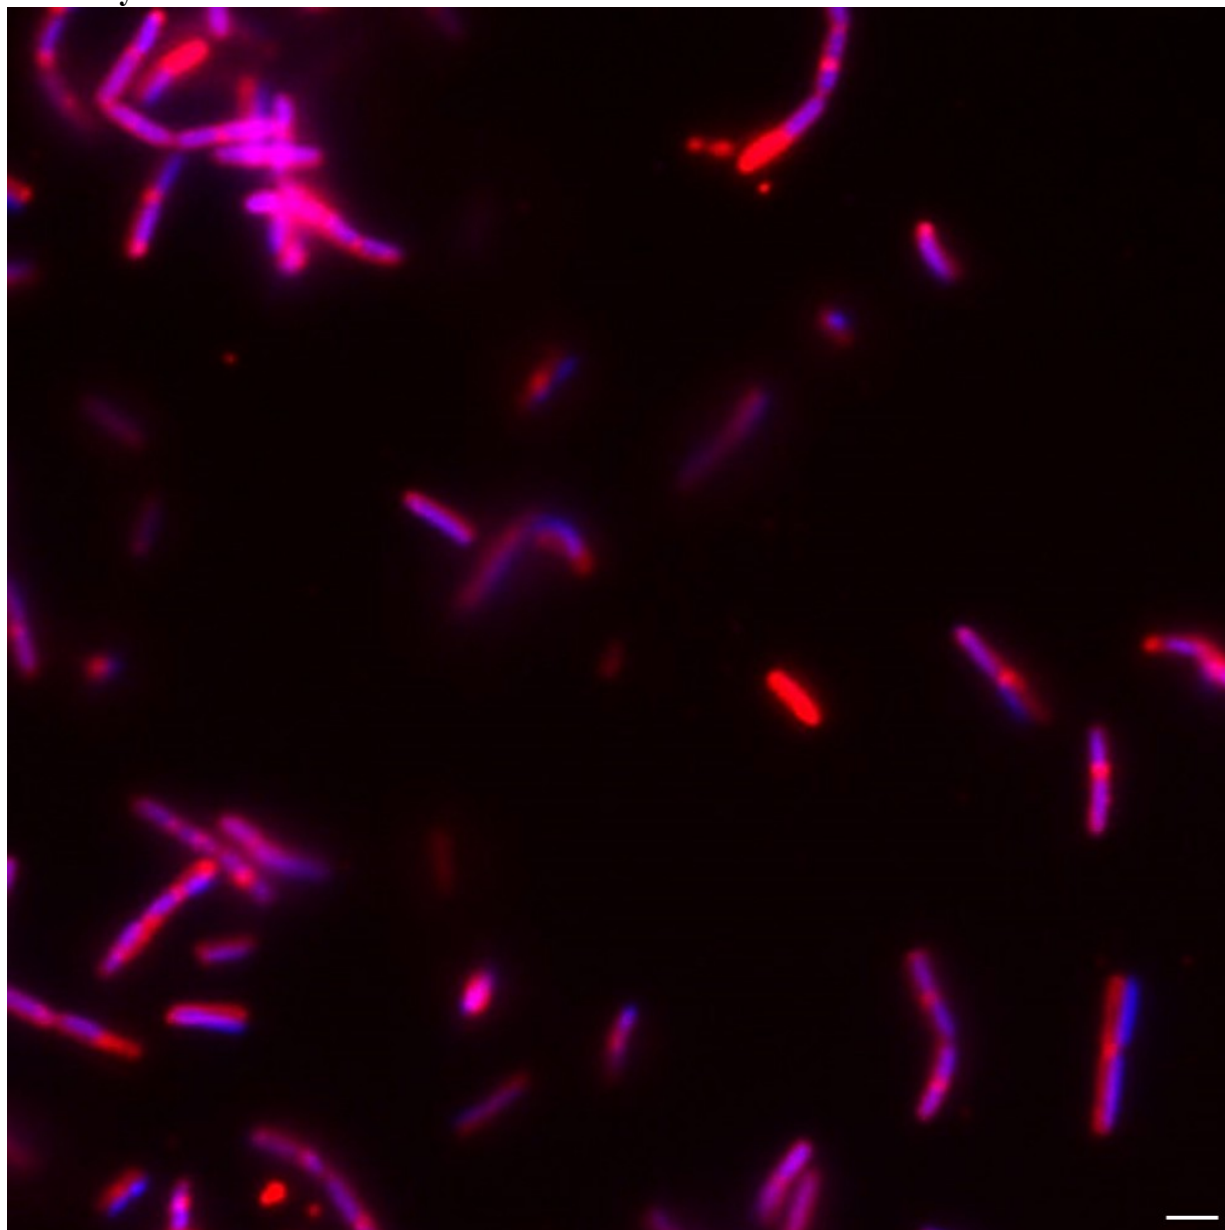

**Figure S9.** Cytological profile of Tobramycin-treated *B. subtilis* treated with DAPI (blue) and FM464 (Red). Corresponding analysis of expected and observed cytological profiles are discussed in the main manuscript. Scale bar 1  $\mu$ M.

**Neomycin**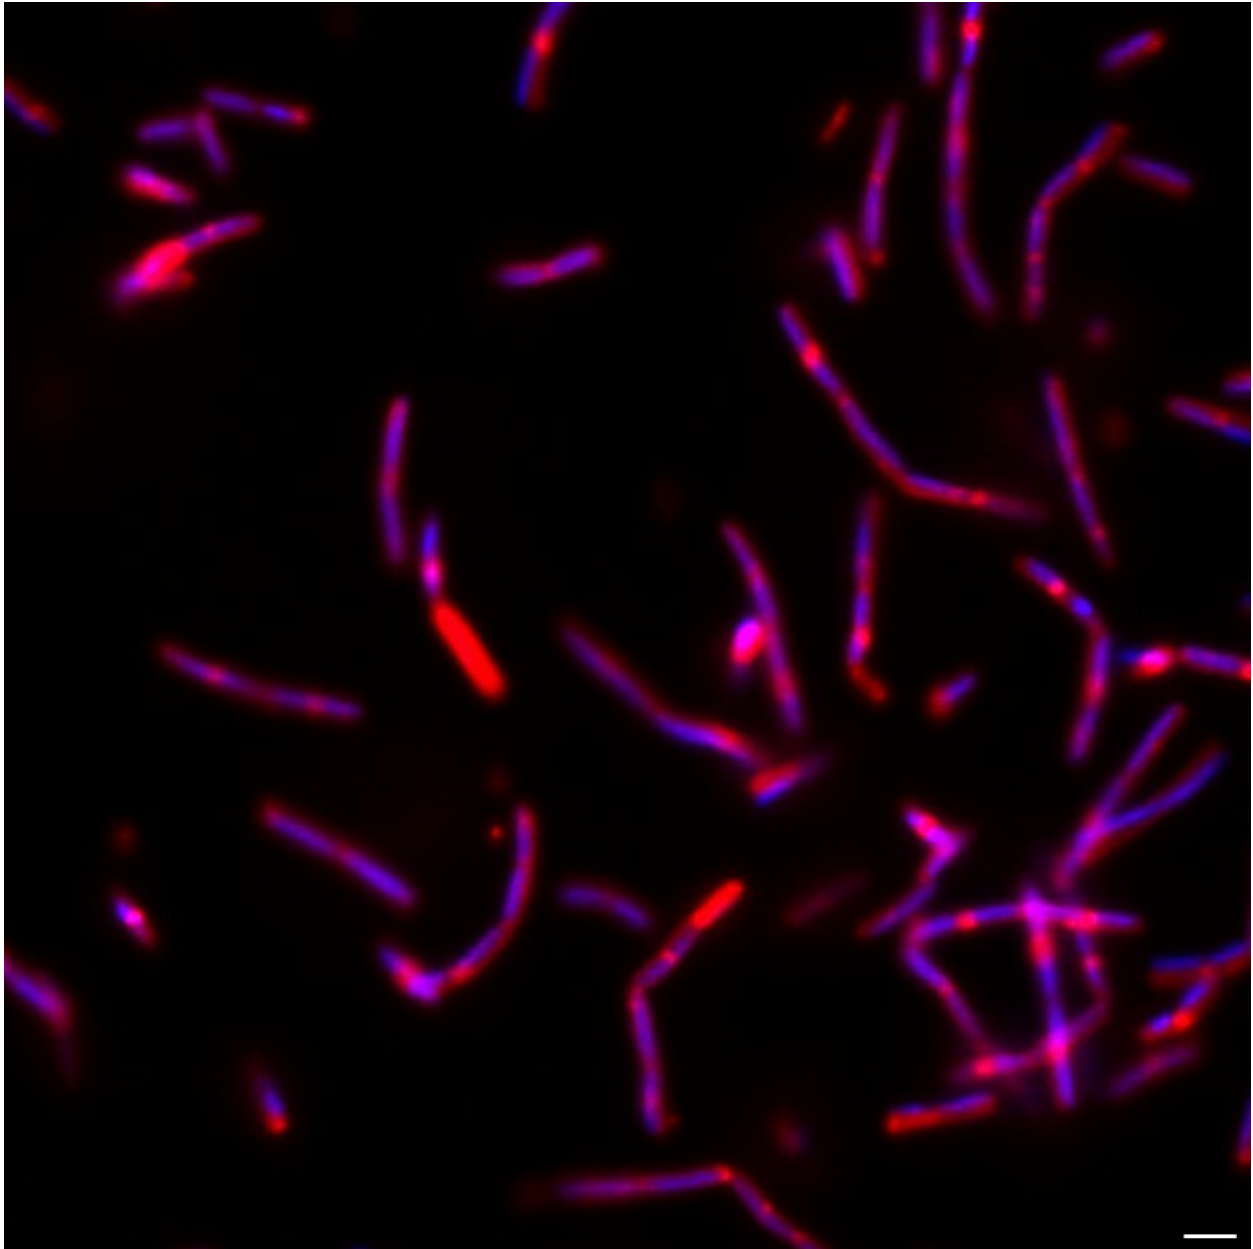

**Figure S10.** Cytological profile of Neomycin-treated *B. subtilis* treated with DAPI (blue) and FM464 (Red). Corresponding analysis of expected and observed cytological profiles are discussed in the main manuscript. Scale bar 1  $\mu\text{M}$ .

## Kanamycin

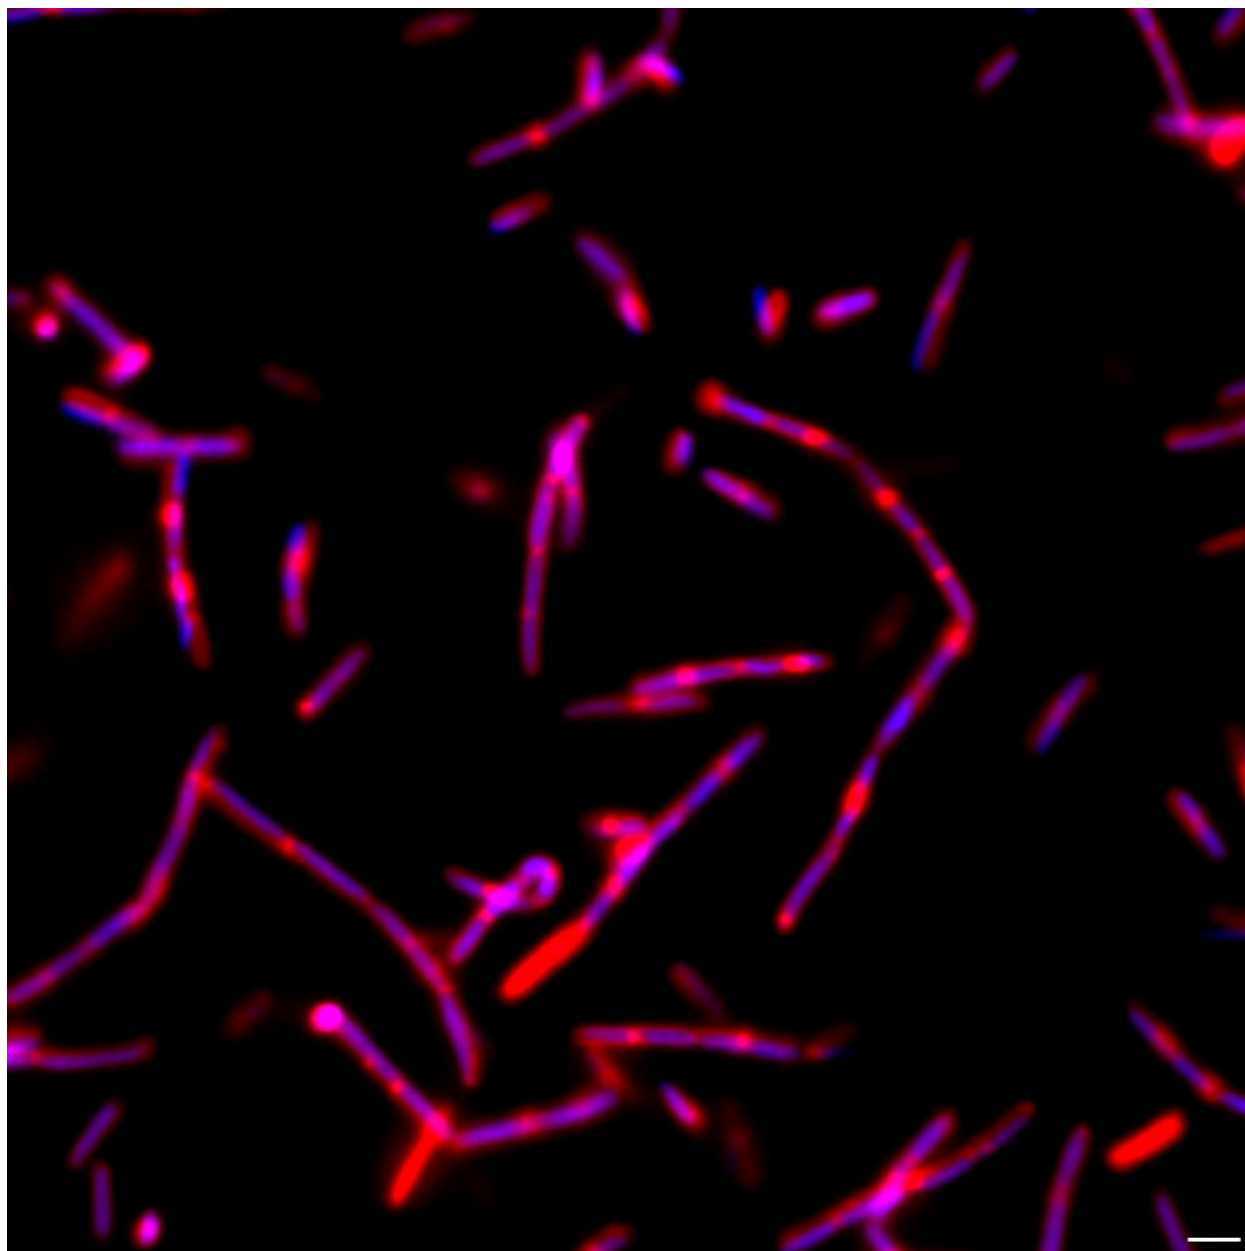

**Figure S11.** Cytological profile of Kanamycin-treated *B. subtilis* treated with DAPI (blue) and FM464 (Red). Corresponding analysis of expected and observed cytological profiles are discussed in the main manuscript. Scale bar 1  $\mu$ M.

**Linezolid**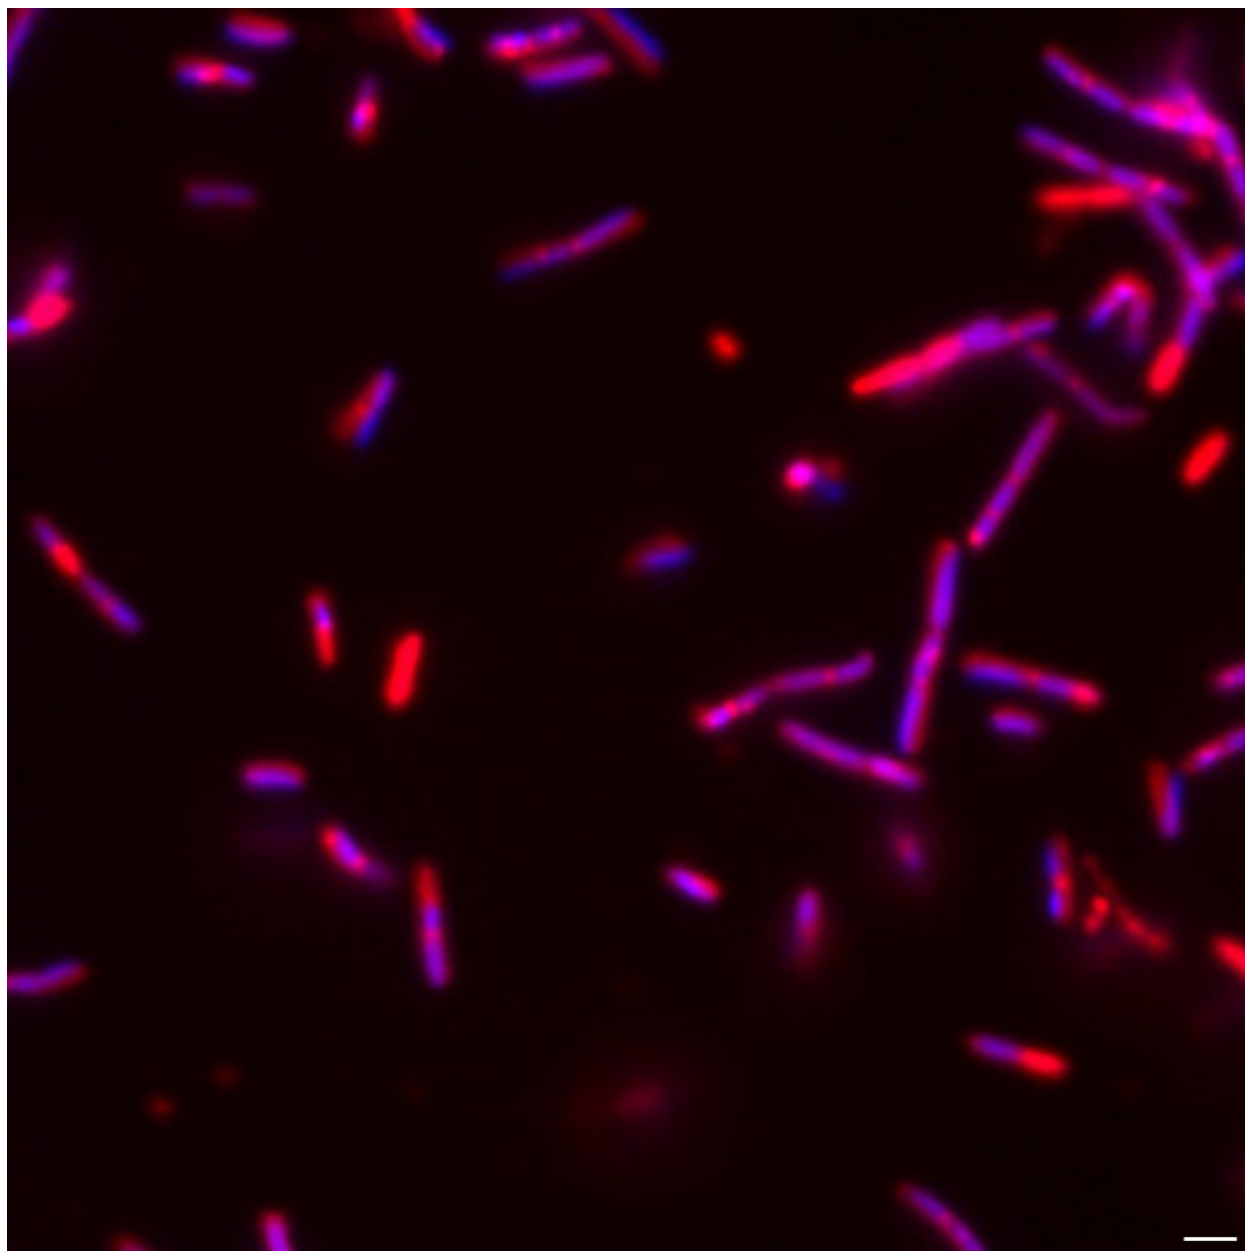

**Figure S12.** Cytological profile of Linezolid-treated *B. subtilis* treated with DAPI (blue) and FM464 (Red). Corresponding analysis of expected and observed cytological profiles are discussed in the main manuscript. Scale bar 1  $\mu$ M.

## Tetracycline

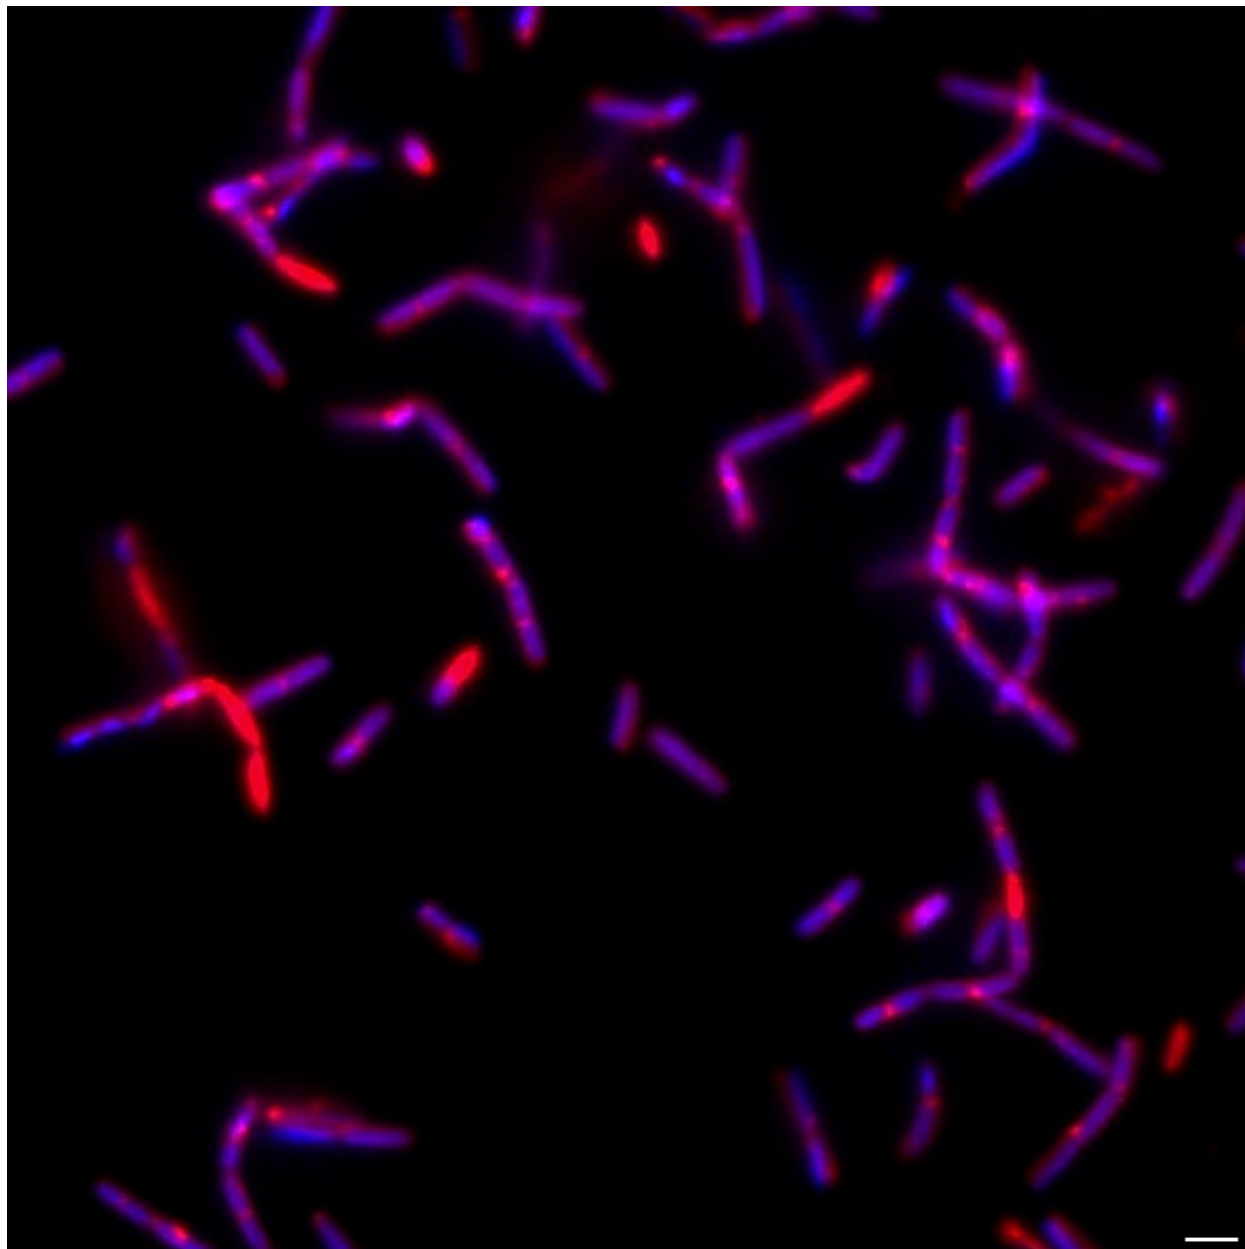

**Figure S13.** Cytological profile of Tetracycline-treated *B. subtilis* treated with DAPI (blue) and FM464 (Red). Corresponding analysis of expected and observed cytological profiles are discussed in the main manuscript. Scale bar 1  $\mu$ M.



## Rifampicin

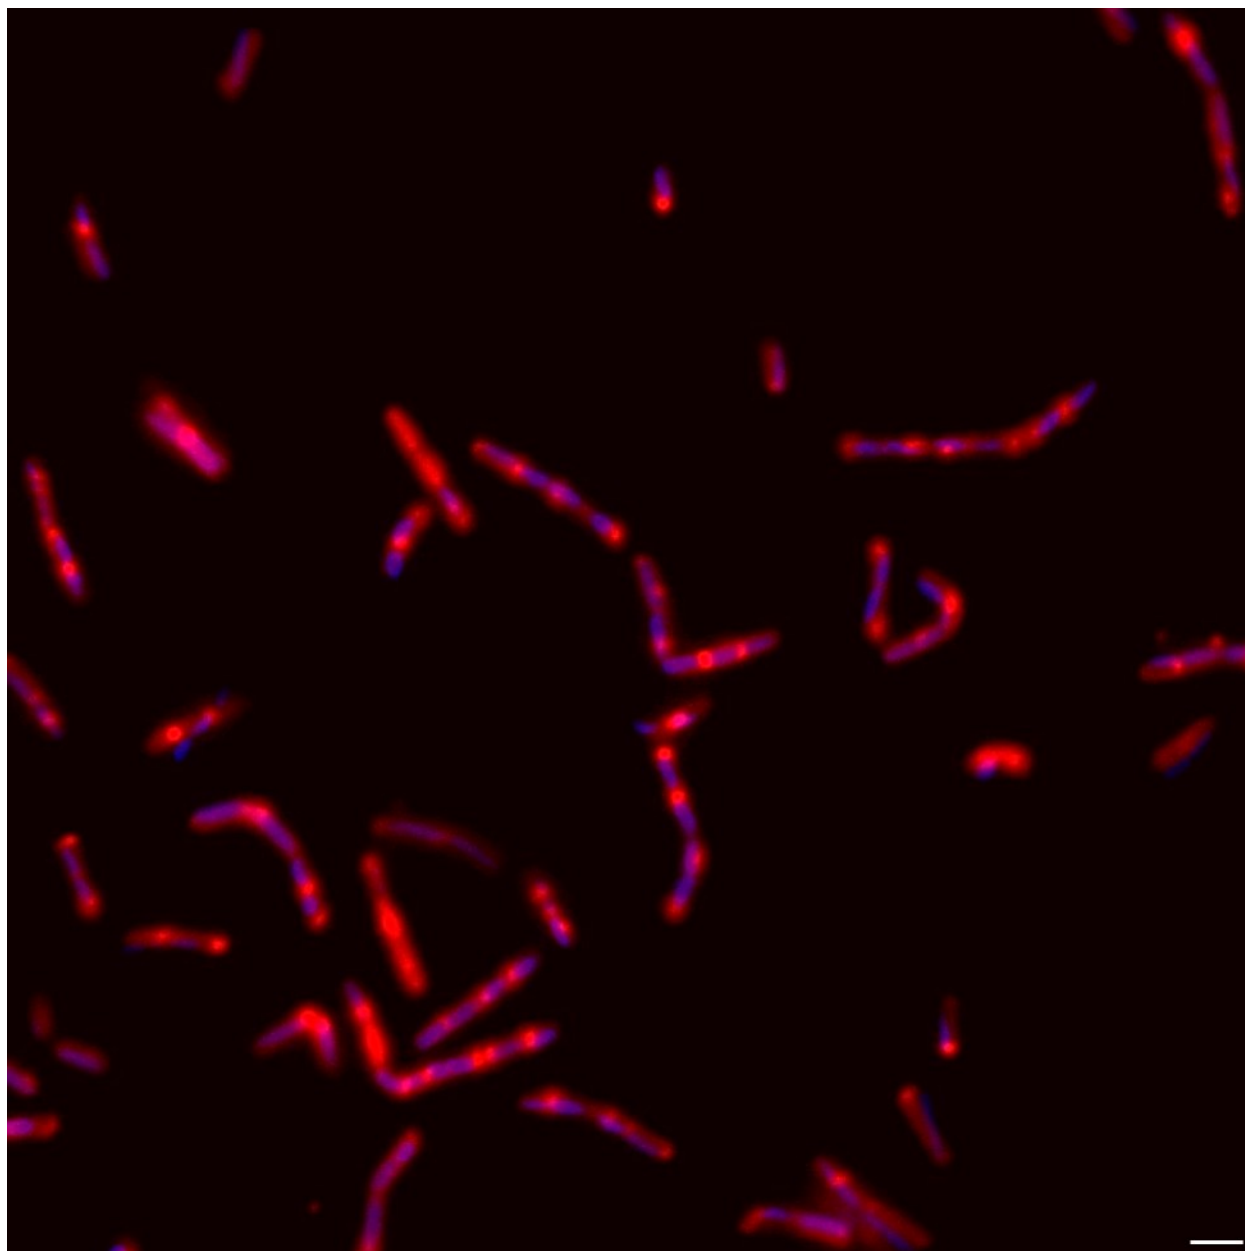

**Figure S14.** Cytological profile of Rifampicin-treated *B. subtilis* treated with DAPI (blue) and FM464 (Red). Corresponding analysis of expected and observed cytological profiles are discussed in the main manuscript. Scale bar 1  $\mu$ M.

**Nisin**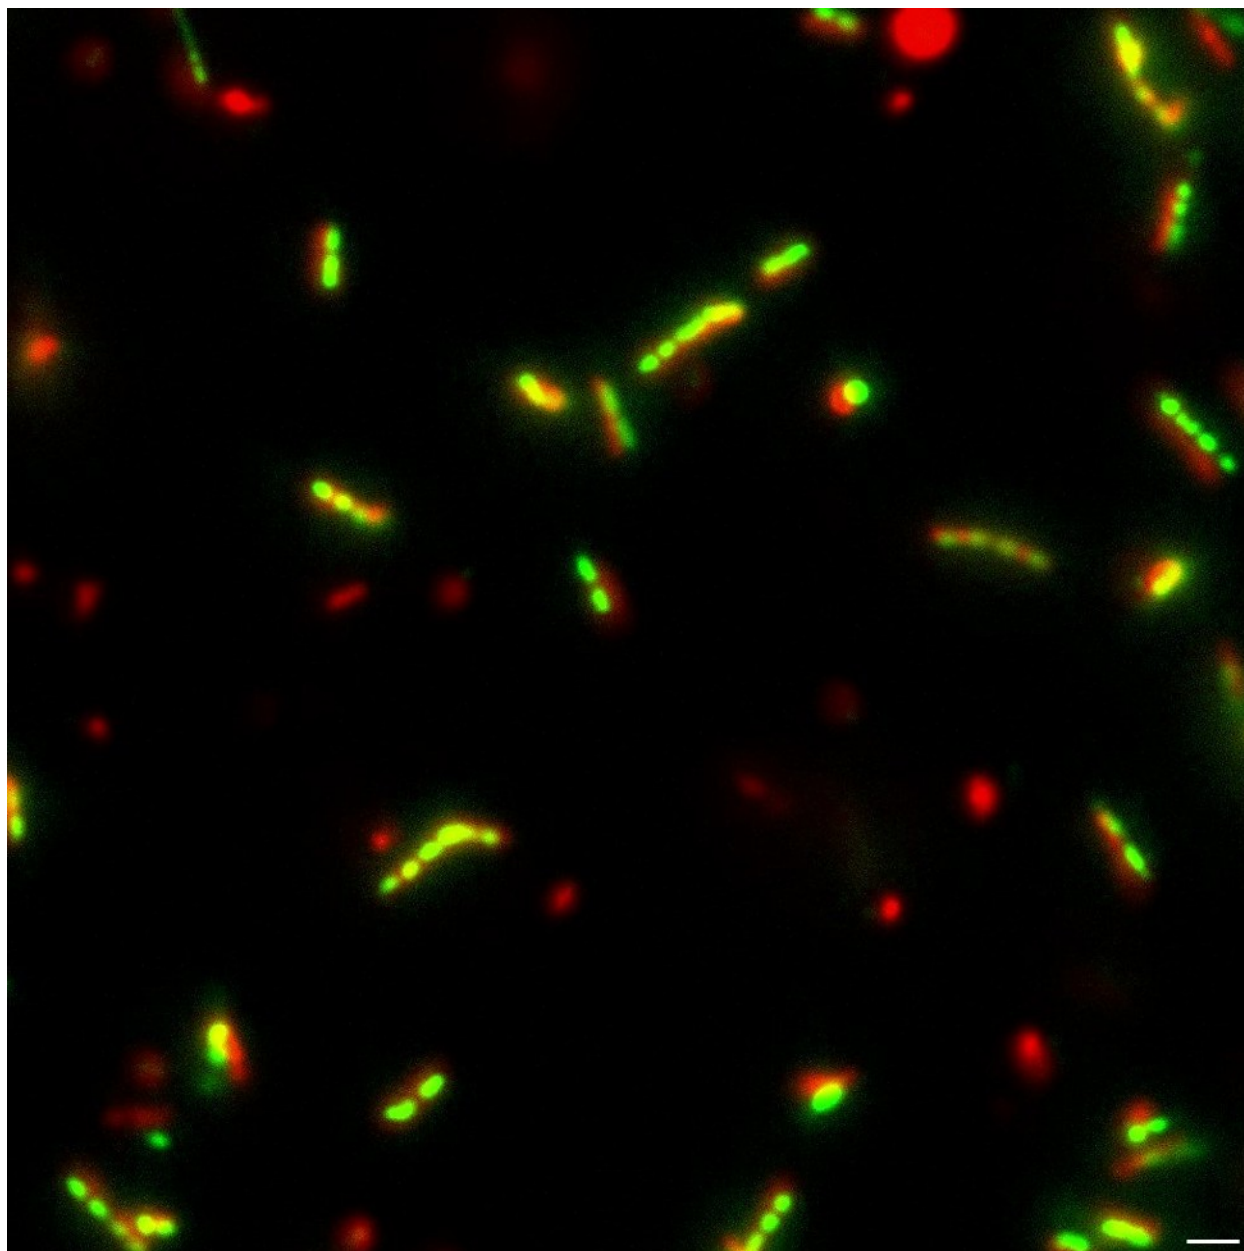

**Figure S15.** Cytological profile of Nisin-treated *B. subtilis* treated with SytoxG (green) and FM4-64 (red). Corresponding analysis of expected and observed cytological profiles are discussed in the main manuscript. Scale bar 1  $\mu$ M.

**Polymyxin B**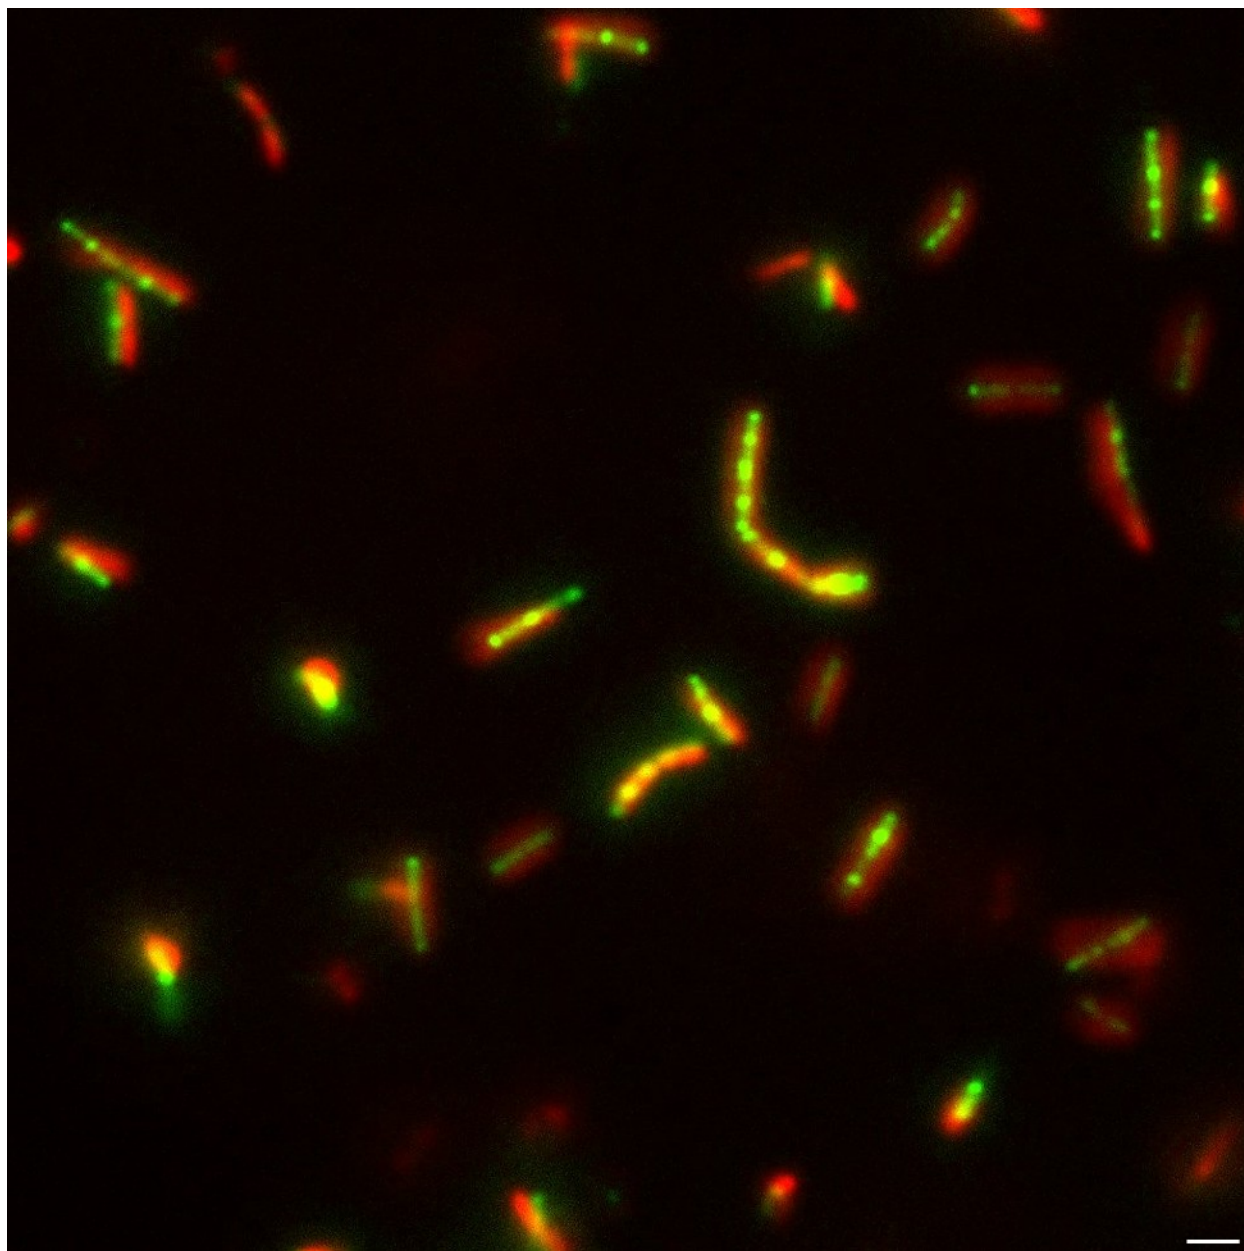

**Figure S16.** Cytological profile of Polymyxin-treated *B. subtilis* treated with SytoxG (green) and FM4-64 (red). Corresponding analysis of expected and observed cytological profiles are discussed in the main manuscript. Scale bar 1  $\mu$ M.

## DPA 154

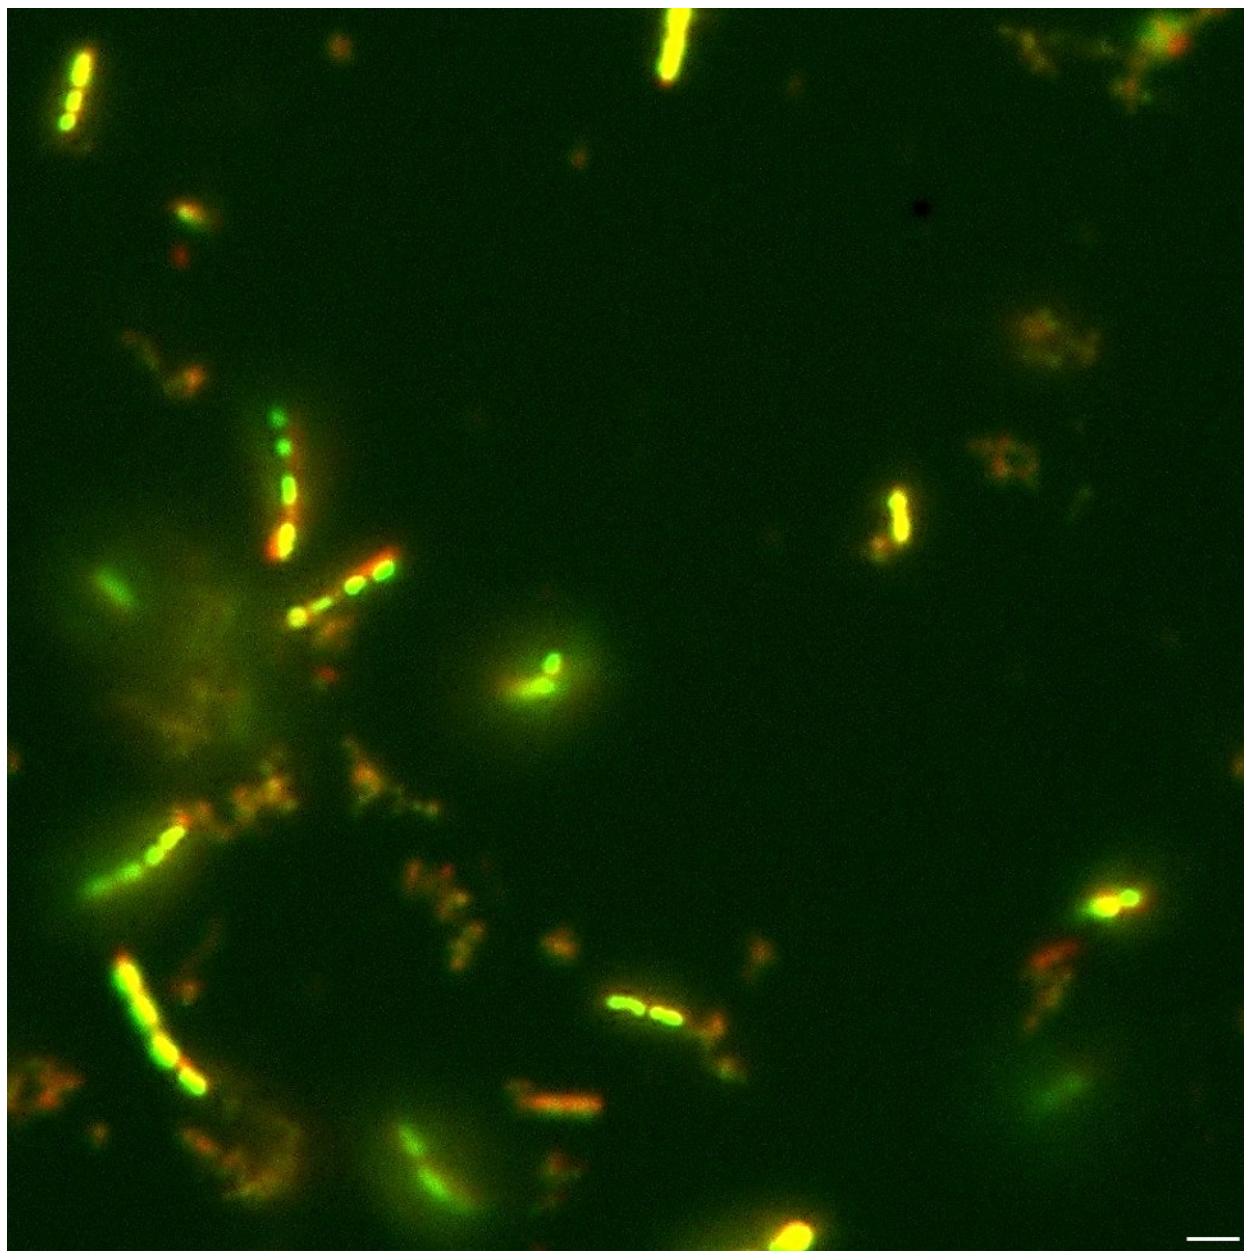

**Figure S17.** *B. subtilis* treated with DPA 154 and dyed with FM4-64 (red) and SytoxG (green). Observed morphologies are discussed in the manuscript. Lysed cellular contents and SytoxG infiltrates are observed in ovoid and filamentous remnant cells. Scale bar 1  $\mu$ M.

**Untreated**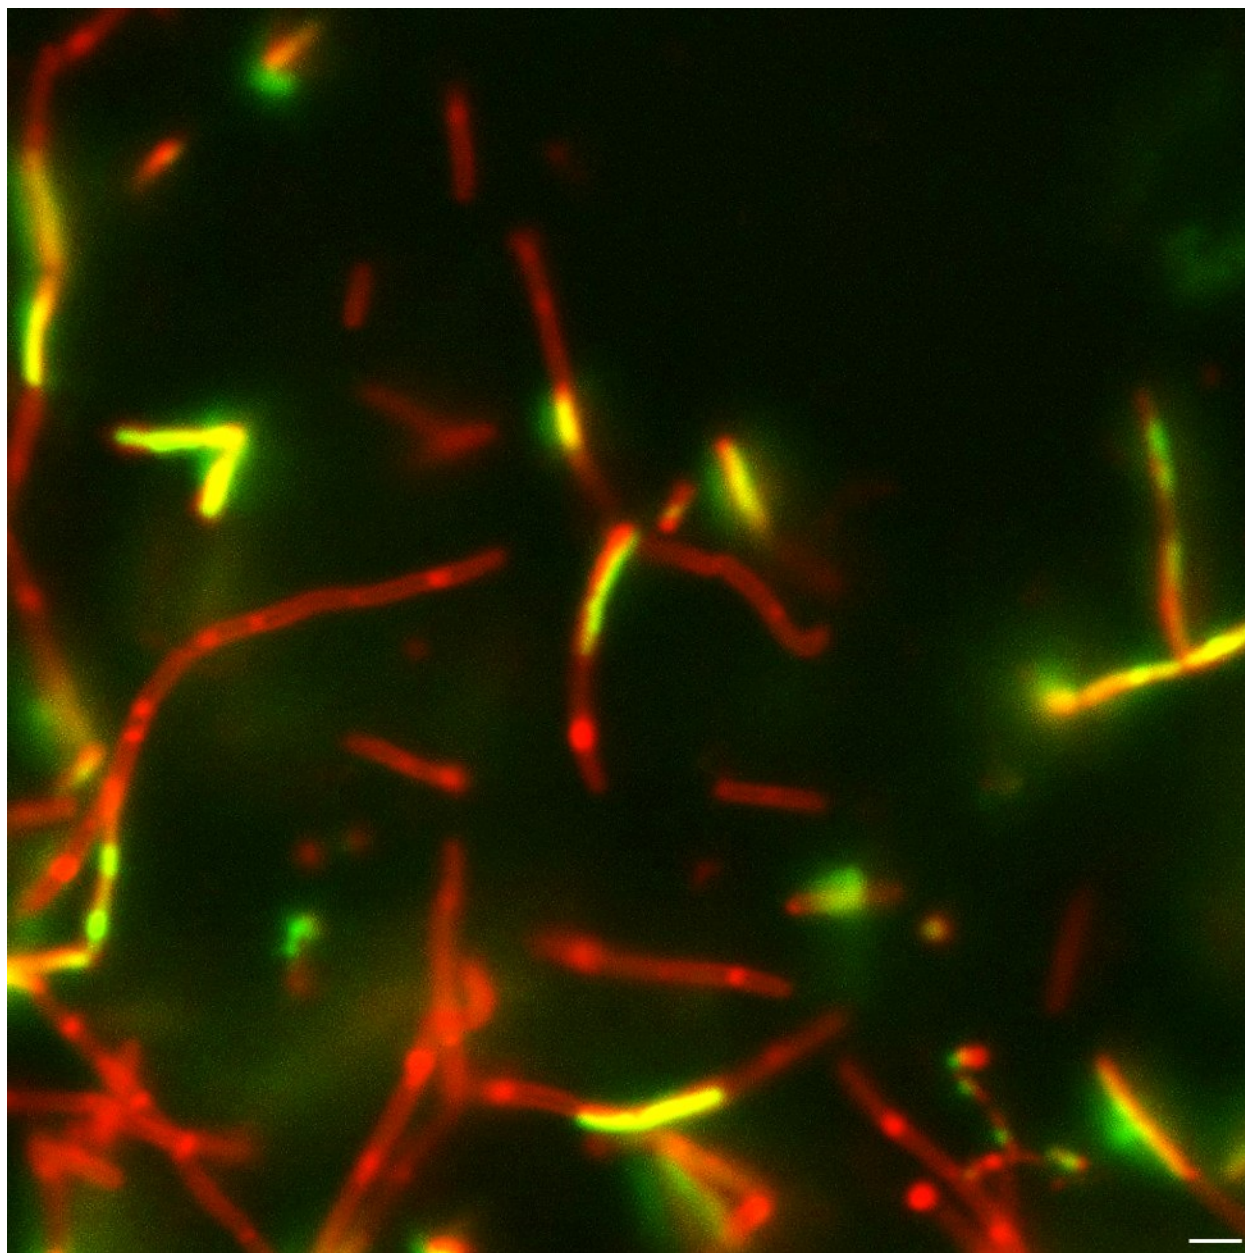

**Figure S18.** Cytological profile of untreated *B. subtilis* treated with SytoxG (green) and FM4-64 (red). Corresponding analysis of expected and observed cytological profiles are discussed in the main manuscript. Scale bar 1  $\mu$ M.

|                                | Ciprofloxacin<br>vs Untreated | Ciprofloxacin<br>vs Hoechst<br>156 | Ciprofloxacin<br>vs Hoechst<br>154 | Untreated<br>vs Hoechst<br>156 | Untreated<br>vs Hoechst<br>154 | Hoechst<br>156 vs<br>Hoechst<br>154 | P                 |
|--------------------------------|-------------------------------|------------------------------------|------------------------------------|--------------------------------|--------------------------------|-------------------------------------|-------------------|
| <b>Cell Area</b>               | 0.9952                        | 0.7907                             | <b>0.0005</b>                      | 0.5349                         | <b>&lt;0.0000</b>              | <b>0.0420</b>                       | <b>&lt;0.0000</b> |
| <b>Cell<br/>Diameter</b>       | 0.9892                        | 0.9980                             | 0.4298                             | 0.9603                         | 0.0814                         | 0.6131                              | 0.1260            |
| <b>Cell Form<br/>Factor</b>    | 0.2578                        | 0.9957                             | <b>&lt;0.0000</b>                  | 0.5066                         | <b>&lt;0.0000</b>              | <b>&lt;0.0000</b>                   | <b>&lt;0.0000</b> |
| <b>Cell<br/>Length</b>         | 0.6897                        | 0.9773                             | <b>&lt;0.0000</b>                  | 0.4410                         | <b>&lt;0.0000</b>              | <b>&lt;0.0000</b>                   | <b>&lt;0.0000</b> |
| <b>Cell<br/>Perimeter</b>      | 0.3366                        | 0.9953                             | <b>&lt;0.0000</b>                  | 0.6033                         | <b>&lt;0.0000</b>              | <b>&lt;0.0000</b>                   | <b>&lt;0.0000</b> |
| <b>DNA Area</b>                | 0.5621                        | 0.3778                             | 0.9872                             | 0.8696                         | 0.2095                         | 0.1752                              | 0.0953            |
| <b>DNA<br/>Diameter</b>        | <b>&lt;0.0000</b>             | 0.9377                             | 0.6876                             | <b>&lt;0.0000</b>              | <b>&lt;0.0000</b>              | 0.3499                              | <b>&lt;0.0000</b> |
| <b>DNA<br/>Form<br/>Factor</b> | <b>&lt;0.0000</b>             | 0.9608                             | 0.0607                             | <b>&lt;0.0000</b>              | <b>&lt;0.0000</b>              | 0.2786                              | <b>&lt;0.0000</b> |
| <b>DNA<br/>Length</b>          | <b>0.0006</b>                 | 0.9525                             | 0.7307                             | <b>0.0215</b>                  | <b>0.0111</b>                  | 0.9797                              | <b>&lt;0.0000</b> |
| <b>DNA<br/>Perimeter</b>       | <b>0.0317</b>                 | 0.5232                             | 0.7608                             | 0.8407                         | 0.2500                         | 0.9446                              | <b>0.0296</b>     |

**Table S15.** One-way ANOVA test comparing the means of each of the chosen cell morphology measurements evaluated against each individual treatment.  $\alpha = 0.05$ . Significant results are labeled in bold. Individual treatment P-values were calculated using a Tukey HSD Post-Hoc test for every observation. DPA 154, but not 156, shows significant morphology differences from ciprofloxacin.

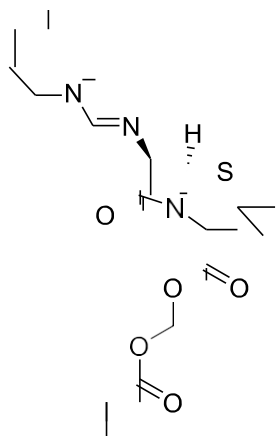

Pivmecillinam  
Cell Wall Synthesis

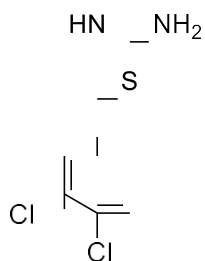

A22 [S-(3,4-  
Dichlorobenzyl)isothioureia]  
Cytoskeleton Inhibitor

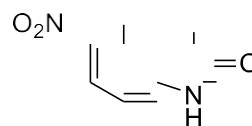

5-nitro-2-oxyindole  
Efflux Pump Inhibitor

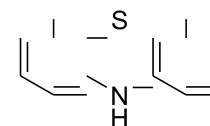

Phenothiazine  
Efflux Pump Inhibitor

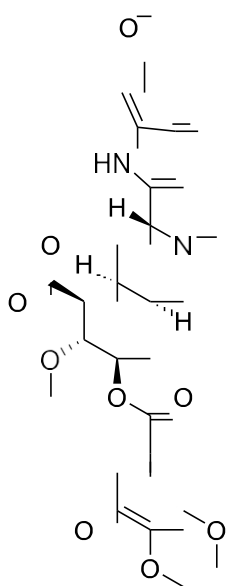

Reserpine  
Efflux Pump  
Inhibitor

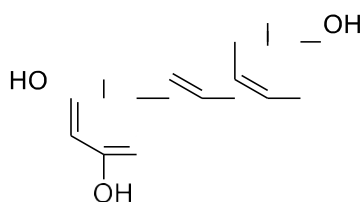

Resveratrol  
Efflux Pump Inhibitor

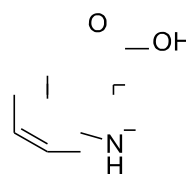

Indole-3-carboxylic acid  
Efflux Pump Inhibitor

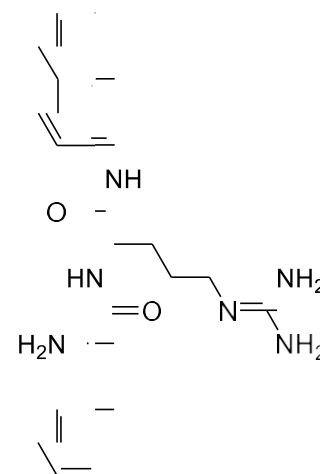

Phenylalanine-Arginine  
Beta-Naphthylamide  
Efflux Pump Inhibitor

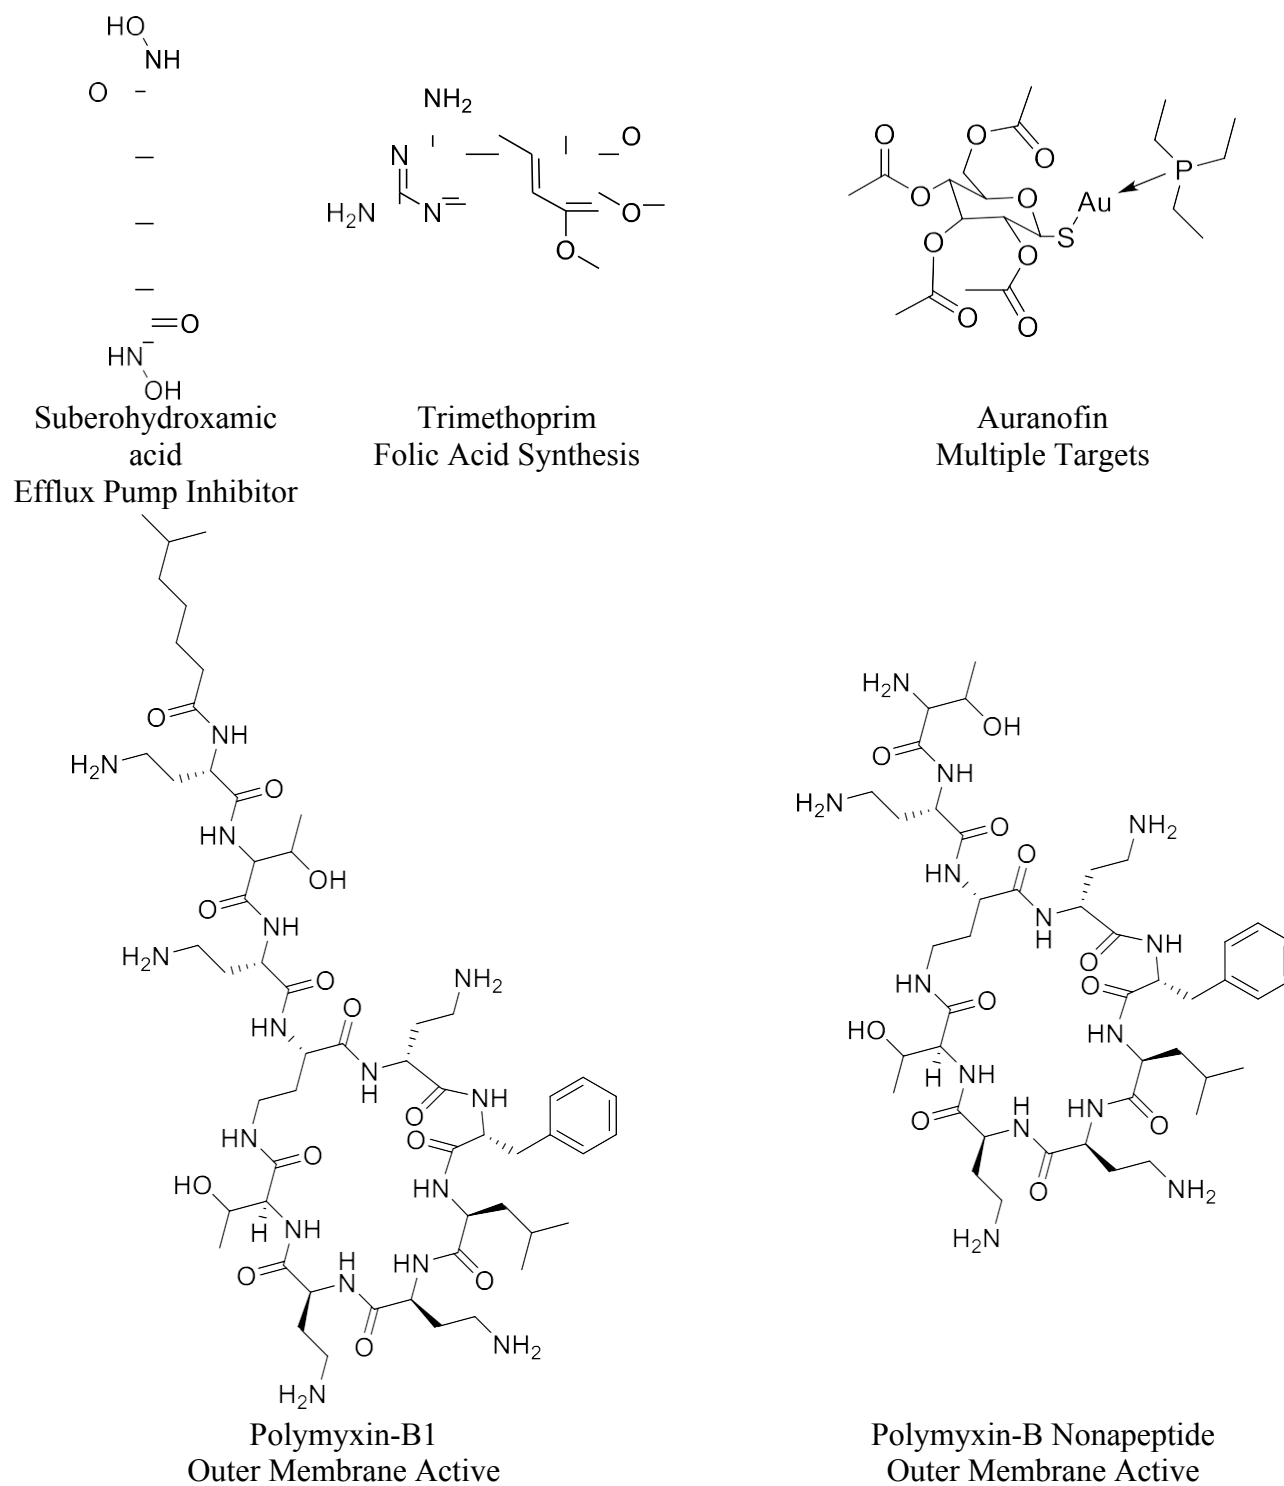

**Figure S19.** Structures of all synergy compounds used in this study.



**Table S16.** Concentrations of test compounds used in synergy assays and minimal inhibitory concentration in bacteria.

| Compounds                                    | Conc.<br>( $\mu\text{M}$ ) | Mechanism        | MIC ( $\mu\text{M}$ )   |                       |                                           |                                         |
|----------------------------------------------|----------------------------|------------------|-------------------------|-----------------------|-------------------------------------------|-----------------------------------------|
|                                              |                            |                  | <i>E. coli</i><br>25922 | <i>E. coli</i><br>H4H | <i>K.</i><br><i>pneumoniae</i><br>NR15410 | <i>P.</i><br><i>aeruginosa</i><br>27853 |
| Pivmecillinam <sup>14</sup>                  | 10                         | Cell Wall        | 12.5                    | 25                    | >50                                       | >50                                     |
| A22 <sup>15</sup>                            | 50                         | Cytoskeleton     | >50                     | >50                   | >50                                       | >50                                     |
| 5-nitro-2-oxyIndole <sup>16</sup>            | 100                        | Efflux Pump      | >200                    | >200                  | >200                                      | >200                                    |
| Phenothiazine <sup>17</sup>                  | 100                        | Efflux Pump      | >200                    | >200                  | >200                                      | >200                                    |
| Reserpine <sup>18</sup>                      | 100                        | Efflux Pump      | >200                    | >200                  | >200                                      | >200                                    |
| Resveratrol <sup>19</sup>                    | 100                        | Efflux Pump      | >200                    | >200                  | >200                                      | >200                                    |
| Indole-3-carboxylic acid <sup>20</sup>       | 100                        | Efflux Pump      | >200                    | >200                  | >200                                      | >200                                    |
| Phe-Arg $\beta$ -naphthylamide <sup>21</sup> | 100                        | Efflux Pump      | >200                    | >200                  | >200                                      | >200                                    |
| Trimethoprim <sup>22</sup>                   | 100                        | Folic Acid       | >32                     | >32                   | >50                                       | >200                                    |
| Suberohydroxamic acid <sup>23</sup>          | 100                        | Iron Chelation   | >200                    | >200                  | >200                                      | >200                                    |
| Polymyxin-B <sup>24</sup>                    | 0.39                       | Outer Membrane   | 1.25                    | 2                     | 6.25                                      | 12.5                                    |
| Polymyxin-B Nonapeptide <sup>25</sup>        | 100                        | Outer Membrane   | >200                    | >200                  | >200                                      | >200                                    |
| Auranofin <sup>26</sup>                      | 20                         | Multiple Targets | >64                     | >32                   | >50                                       | >200                                    |

Abbreviations used: Pivmecillinam (Piv), A22 (S-(3,4-Dichlorobenzyl)isothiourea), 5-nitro-2-oxyIndole (Nitro), Phenothiazine (Pheno), Reserpine (Reserp), Resveratrol (Resver), Indole-3-carboxylic acid (I3C), Phe-Arg $\beta$ -naphthylamide (Pa $\beta$ N), Trimethoprim (Tri), Suberohydroxamid acid (Subero), Polymyxin-B (PMB), polymyxin-B nonapeptide (PMBN), Auranofin (Aur).

### Checkerboard synergy assays of *ESKAPE* Pathogens

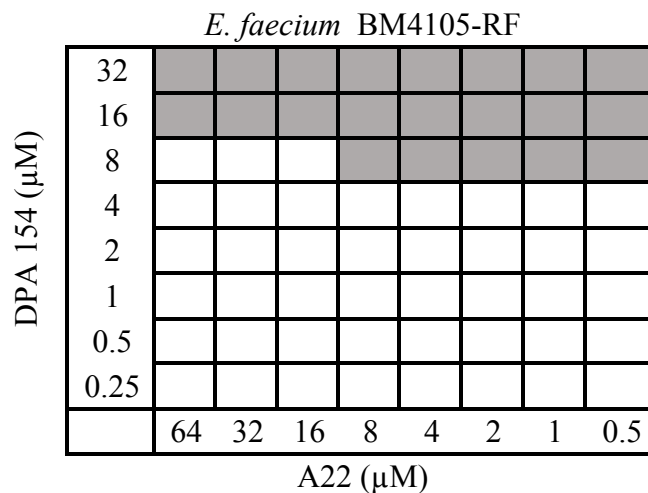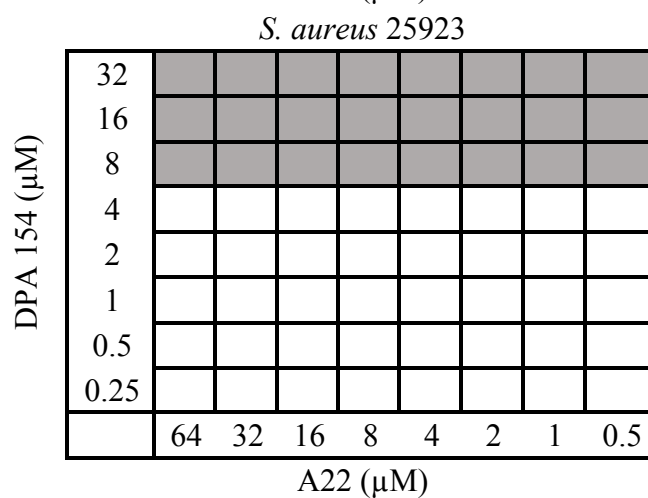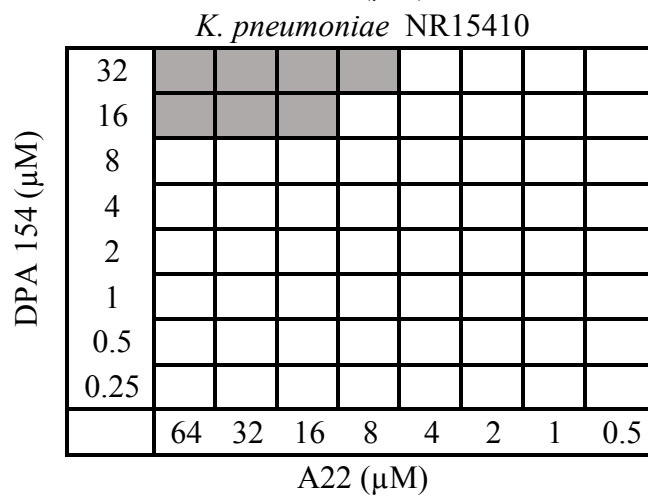

*K. pneumoniae* 1332MRLG

|                    |      |                |    |    |   |   |   |   |     |
|--------------------|------|----------------|----|----|---|---|---|---|-----|
| DPA 154 ( $\mu$ M) | 32   |                |    |    |   |   |   |   |     |
|                    | 16   |                |    |    |   |   |   |   |     |
|                    | 8    |                |    |    |   |   |   |   |     |
|                    | 4    |                |    |    |   |   |   |   |     |
|                    | 2    |                |    |    |   |   |   |   |     |
|                    | 1    |                |    |    |   |   |   |   |     |
|                    | 0.5  |                |    |    |   |   |   |   |     |
|                    | 0.25 |                |    |    |   |   |   |   |     |
|                    |      | 64             | 32 | 16 | 8 | 4 | 2 | 1 | 0.5 |
|                    |      | A22 ( $\mu$ M) |    |    |   |   |   |   |     |

*A. baumannii* 19606

|                    |      |                |    |    |   |   |   |   |     |
|--------------------|------|----------------|----|----|---|---|---|---|-----|
| DPA 154 ( $\mu$ M) | 32   |                |    |    |   |   |   |   |     |
|                    | 16   |                |    |    |   |   |   |   |     |
|                    | 8    |                |    |    |   |   |   |   |     |
|                    | 4    |                |    |    |   |   |   |   |     |
|                    | 2    |                |    |    |   |   |   |   |     |
|                    | 1    |                |    |    |   |   |   |   |     |
|                    | 0.5  |                |    |    |   |   |   |   |     |
|                    | 0.25 |                |    |    |   |   |   |   |     |
|                    |      | 64             | 32 | 16 | 8 | 4 | 2 | 1 | 0.5 |
|                    |      | A22 ( $\mu$ M) |    |    |   |   |   |   |     |

*P. aeruginosa* 27853

|                    |      |                |    |    |   |   |   |   |     |
|--------------------|------|----------------|----|----|---|---|---|---|-----|
| DPA 154 ( $\mu$ M) | 32   |                |    |    |   |   |   |   |     |
|                    | 16   |                |    |    |   |   |   |   |     |
|                    | 8    |                |    |    |   |   |   |   |     |
|                    | 4    |                |    |    |   |   |   |   |     |
|                    | 2    |                |    |    |   |   |   |   |     |
|                    | 1    |                |    |    |   |   |   |   |     |
|                    | 0.5  |                |    |    |   |   |   |   |     |
|                    | 0.25 |                |    |    |   |   |   |   |     |
|                    |      | 64             | 32 | 16 | 8 | 4 | 2 | 1 | 0.5 |
|                    |      | A22 ( $\mu$ M) |    |    |   |   |   |   |     |

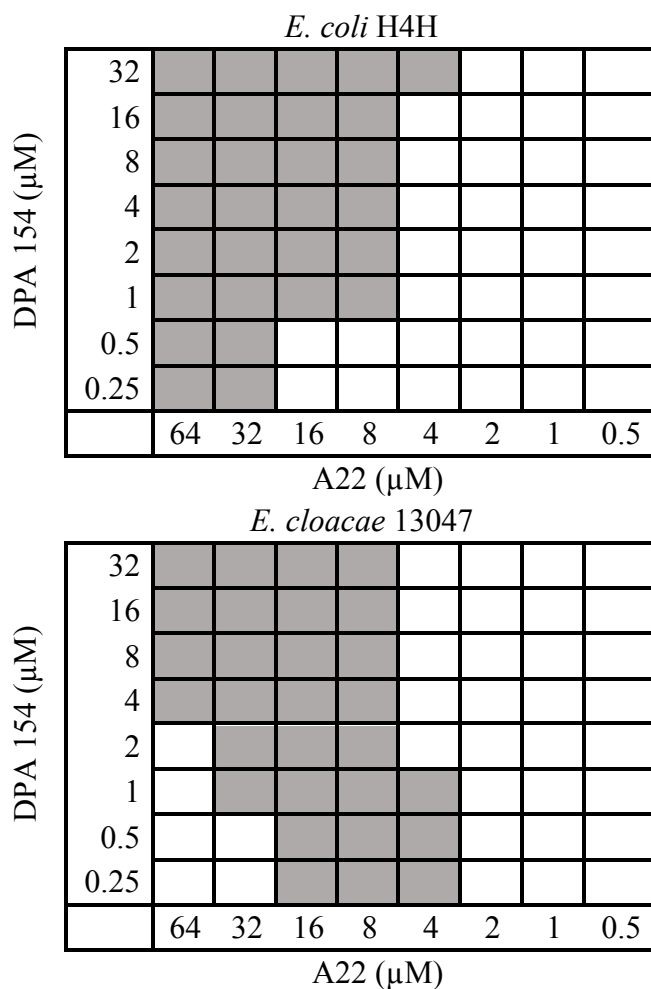

**Figure S20.** Representations of checkerboard synergy assays of DPA 154 and A22 evaluation for synergy across all *ESKAPE* pathogens. Synergy is observed as stepwise inhibition and quantified by FIC index calculation.

| MIC of DPA 154 ( $\mu$ M) in combination with antibiotic |                         |                       |                                 |                               |
|----------------------------------------------------------|-------------------------|-----------------------|---------------------------------|-------------------------------|
| Compound(s)                                              | <i>E. coli</i><br>29522 | <i>E. coli</i><br>H4H | <i>K. Pneumoniae</i><br>NR15410 | <i>P. Aeruginosa</i><br>27853 |
| Hoechst 33258                                            | 30 <sup>a</sup>         | 32                    | 35 <sup>a</sup>                 | 30 <sup>a</sup>               |
| Hoechst 33342                                            | 18 <sup>a</sup>         | 4                     | 15 <sup>a</sup>                 | 18 <sup>a</sup>               |
| DPA 153                                                  | >64                     | >64                   | >64                             | >64                           |
| DPA 154                                                  | 64                      | 32                    | >64                             | >64                           |
| DPA 156                                                  | >64                     | >64                   | >64                             | >64                           |
| Hoechst 33258 + PolyB                                    | 16                      | 4-8                   | 4                               | 8                             |
| Hoechst 33342 + PolyB                                    | 4-8                     | 1-2                   | 2                               | 4-8                           |
| DPA 153 + PolyB                                          | 16                      | 4                     | 16                              | 8                             |
| DPA 154 + PolyB                                          | 16                      | 8                     | 8                               | 16                            |
| DPA 156 + PolyB                                          | 16-32                   | 4-8                   | 16-32                           | 16-32                         |
| Hoechst 33258 + PMBN                                     | >32                     | >32                   | >32                             | >32                           |
| Hoechst 33342 + PMBN                                     | 2                       | 2                     | 2                               | 1                             |
| DPA 153 + PMBN                                           | >32                     | >32                   | >32                             | >32                           |
| DPA 154 + PMBN                                           | 16                      | 16-32                 | 16                              | 32                            |
| DPA 156 + PMBN                                           | >32                     | >32                   | >32                             | >32                           |
| Hoechst 33258 + PA $\beta$ N                             | >32                     | >32                   | >32                             | >32                           |
| Hoechst 33342 + PA $\beta$ N                             | 0.5                     | 0.5                   | 2                               | 2                             |
| DPA 153 + PA $\beta$ N                                   | >32                     | >32                   | >32                             | >32                           |
| DPA 154 + PA $\beta$ N                                   | 2-4                     | 2-4                   | 32                              | 16                            |
| DPA 156 + PA $\beta$ N                                   | >32                     | >32                   | >32                             | >32                           |
| Hoechst 33258 + Tri                                      | >32                     | >32                   | >32                             | >32                           |
| Hoechst 33342 + Tri                                      | 32                      | 8-16                  | 16-32                           | >32                           |
| DPA 153 + Tri                                            | >32                     | >32                   | >32                             | >32                           |
| DPA 154 + Tri                                            | 32                      | 32                    | >32                             | >32                           |
| DPA 156 + Tri                                            | >32                     | >32                   | >32                             | >32                           |
| Hoechst 33258 + Aur                                      | >32                     | >32                   | >32                             | >32                           |
| Hoechst 33342 + Aur                                      | 8-16                    | 8-16                  | 16-32                           | >32                           |
| DPA 153 + Aur                                            | >32                     | >32                   | >32                             | >32                           |
| DPA 154 + Aur                                            | >32                     | >32                   | >32                             | >32                           |
| DPA 156 + Aur                                            | >32                     | >32                   | >32                             | >32                           |
| Hoechst 33258 + A22                                      | >32                     | >32                   | 0.25                            | 0.25                          |
| Hoechst 33342 + A22                                      | >32                     | 8                     | 0.25                            | 0.25                          |
| DPA 153 + A22                                            | 16                      | 8                     | 0.25                            | 0.25                          |
| DPA 154 + A22                                            | 16                      | 1                     | 0.25                            | 0.25                          |
| DPA 156 + A22                                            | 16                      | 8                     | 0.25                            | 0.25                          |
| Hoechst 33258 + I3C                                      | 0.25                    | >32                   | >32                             | ---                           |
| Hoechst 33342 + I3C                                      | 0.25                    | >32                   | >32                             | ---                           |
| DPA 153 + I3C                                            | 0.25                    | >32                   | >32                             | ---                           |
| DPA 154 + I3C                                            | 0.25                    | >32                   | >32                             | ---                           |
| DPA 156 + I3C                                            | 0.25                    | >32                   | >32                             | ---                           |
| Hoechst 33258 + Nitro                                    | >32                     | >32                   | >32                             | >32                           |
| Hoechst 33342 + Nitro                                    | >32                     | >32                   | >32                             | >32                           |
| DPA 153 + Nitro                                          | >32                     | >32                   | >32                             | >32                           |

|                        |     |      |     |     |
|------------------------|-----|------|-----|-----|
| DPA 154 + Nitro        | >32 | >32  | >32 | >32 |
| DPA 156 + Nitro        | >32 | >32  | >32 | >32 |
| Hoechst 33258 + Pheno  | >32 | >32  | >32 | >32 |
| Hoechst 33342 + Pheno  | >32 | >32  | >32 | >32 |
| DPA 153 + Pheno        | >32 | >32  | >32 | >32 |
| DPA 154 + Pheno        | >32 | >32  | >32 | >32 |
| DPA 156 + Pheno        | >32 | >32  | >32 | >32 |
| Hoechst 33258 + Piv    | >32 | 0.25 | >32 | >32 |
| Hoechst 33342 + Piv    | >32 | 0.25 | >32 | >32 |
| DPA 153 + Piv          | >32 | 0.25 | >32 | >32 |
| DPA 154 + Piv          | >32 | 0.25 | >32 | >32 |
| DPA 156 + Piv          | >32 | 0.25 | >32 | >32 |
| Hoechst 33258 + Reserp | >32 | 0.25 | >32 | >32 |
| Hoechst 33342 + Reserp | >32 | 0.25 | >32 | >32 |
| DPA 153 + Reserp       | >32 | 0.25 | >32 | >32 |
| DPA 154 + Reserp       | >32 | 0.25 | >32 | >32 |
| DPA 156 + Reserp       | >32 | 0.25 | >32 | >32 |
| Hoechst 33258 + Resver | >32 | >32  | >32 | >32 |
| Hoechst 33342 + Resver | 0.5 | >32  | >32 | >32 |
| DPA 153 + Resver       | >32 | >32  | >32 | >32 |
| DPA 154 + Resver       | 1   | >32  | >32 | >32 |
| DPA 156 + Resver       | 16  | >32  | >32 | >32 |
| Hoechst 33258 + Resver | >32 | >32  | >32 | >32 |
| Hoechst 33342 + Resver | >32 | >32  | >32 | >32 |
| DPA 153 + Resver       | >32 | >32  | >32 | >32 |
| DPA 154 + Resver       | >32 | >32  | >32 | >32 |
| DPA 156 + Resver       | >32 | >32  | >32 | >32 |

**Table S17.** Total SPSA results for all compounds screened in this study. Compound structures found in Figure 9. <sup>a</sup> MIC values referenced from Ranjan et al. 2017<sup>27, 28</sup>

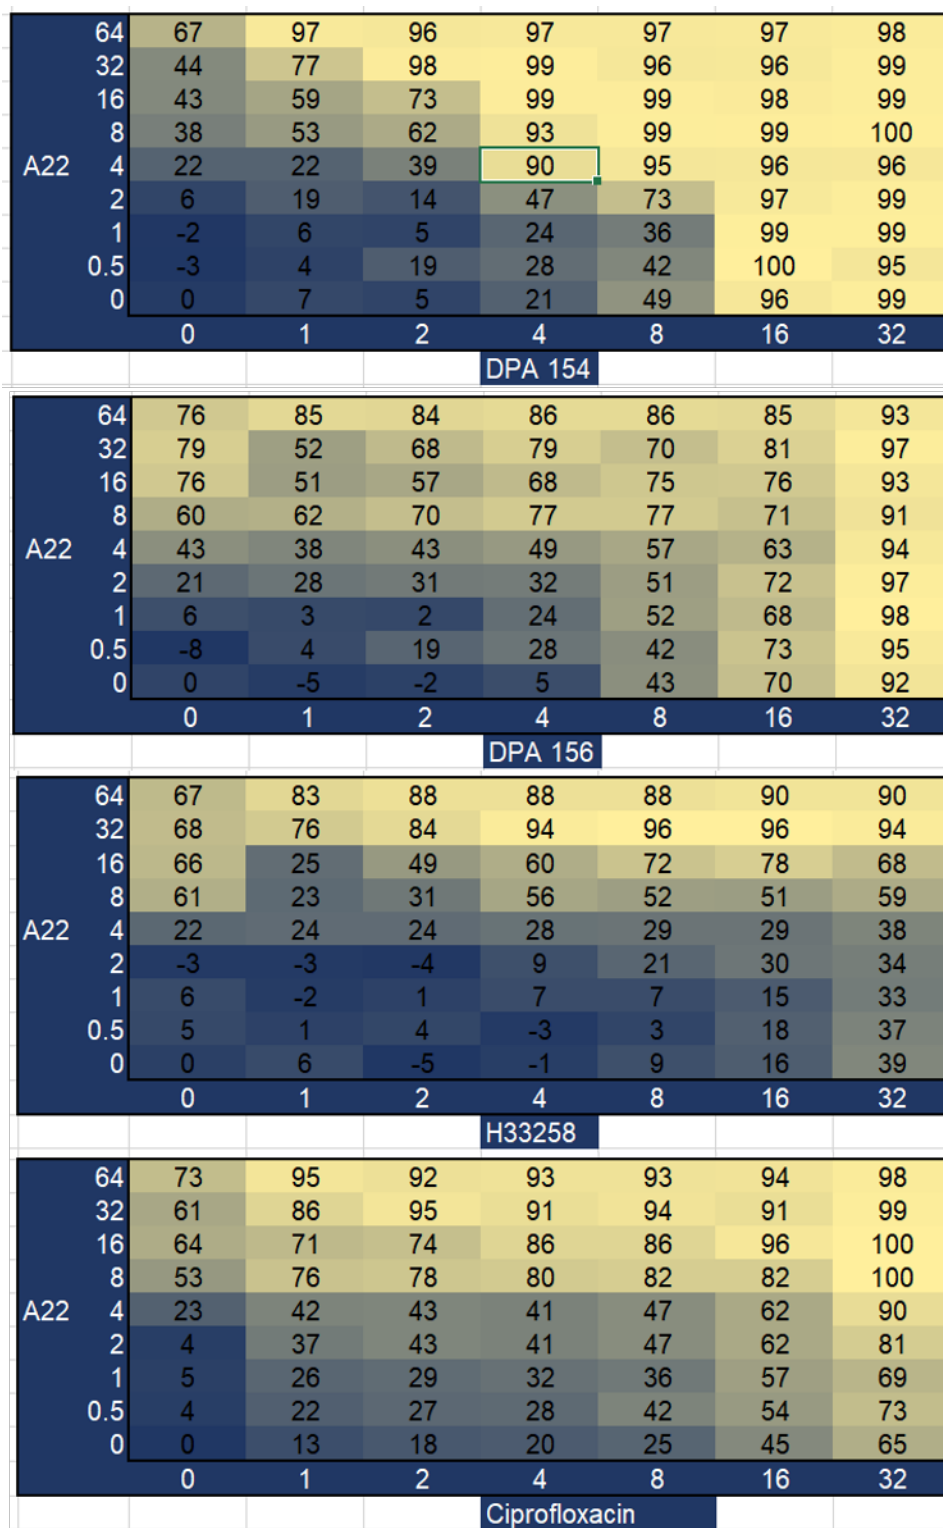

**Figure S21.** Synergistic action of A22 against ciprofloxacin-resistant *Acinetobacter baumannii*.

Checkerboard broth microdilution assays between A22 and top to bottom: DPA 154, DPA 156,

H33258 and ciprofloxacin. Dark regions represent higher cell density and numbers are the percent growth inhibition as determined by optical density at  $A_{600nm}$ . The A22 / DPA 154 and A22 / ciprofloxacin combinations are synergistic by FICI calculation while synergy is not observed with A22, 156, or H33258.

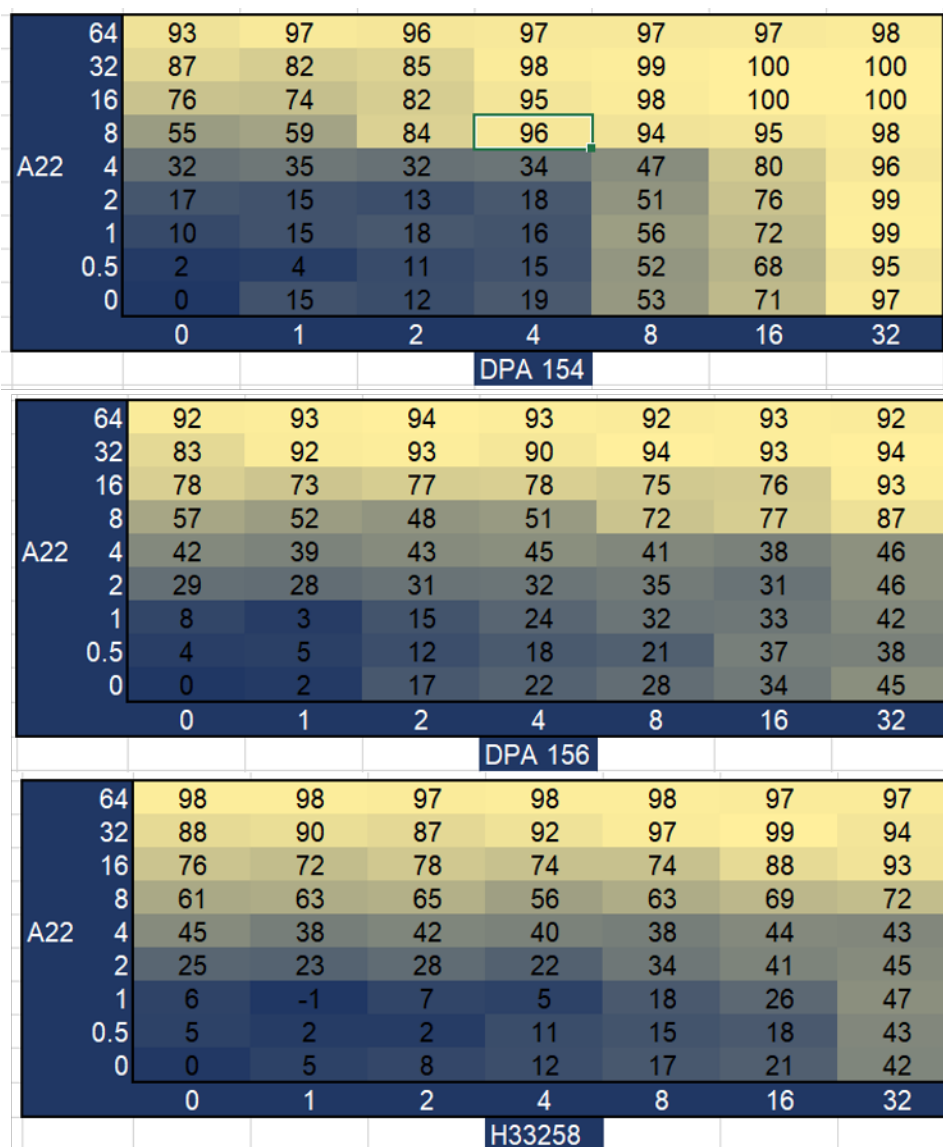

**Figure S22.** Synergistic action of A22 against *Escherichia coli* 25922. Checkerboard broth microdilution assays between A22 and top to bottom: DPA 154, DPA 156 and H33258. Dark regions represent higher cell density and numbers are the percent growth inhibition as



determined by optical density at  $A_{600\text{nm}}$ . Significant synergy is observed with the A22 / DPA 154 combination and no synergy with DPA 156 and H33258.

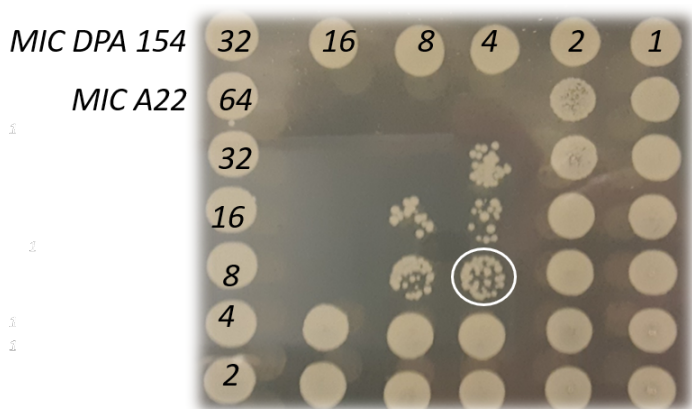

**Figure S23.** Representative example of spot plating from checkerboard synergy plate. *E. coli* 25922 was incubated with the A22/DPA154 combination 37°C for 16 h followed by spot plating 10  $\mu\text{L}$  from each well onto tryptic soy agar plates and incubated at 37°C for 16 h for colony forming unit enumeration.

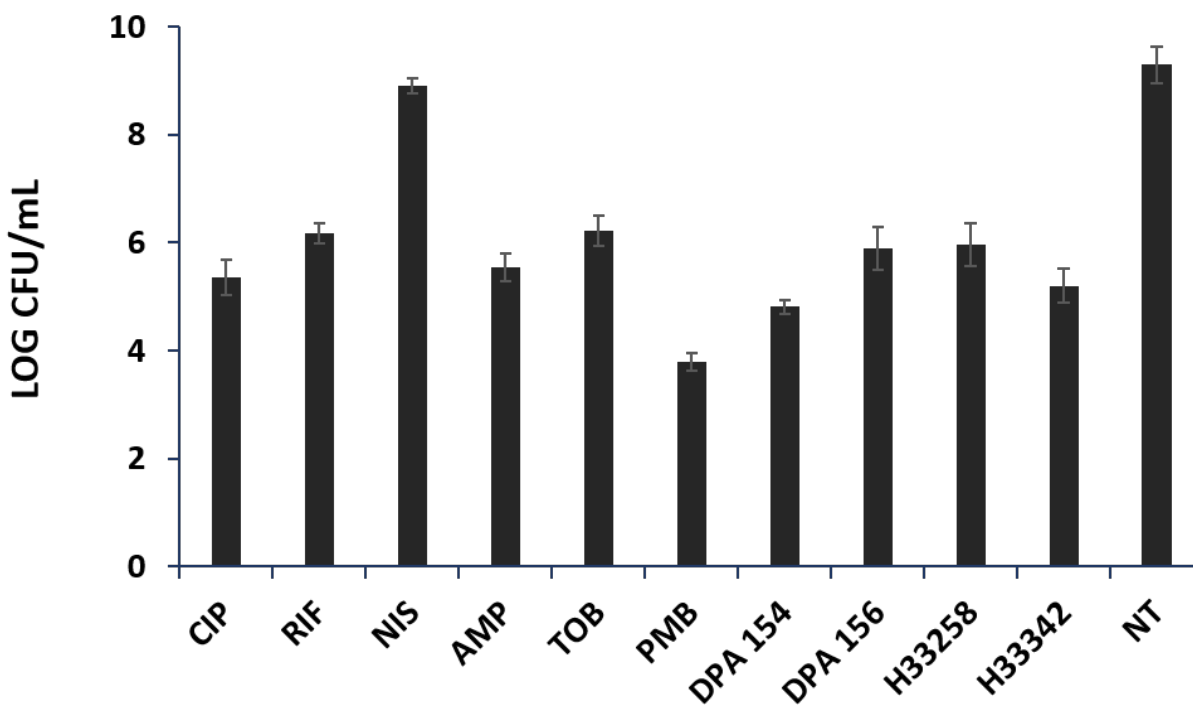

**Figure S24** (addendum to SYTOX Green fluorescence experiment) Culturable number of *E. coli* cells treated with 5x MIC DPA 154, DPA 156 and antibiotics for 3 h. Abbreviations: CIP

ciprofloxacin, NIS nisin, RIF rifampicin, AMP ampicillin, TOB tobramycin, PMB polymyxin-B, H33258, H3342 Hoechst dye controls, NT no treatment. Error bars represent the standard deviation from the mean for assays performed on three occasions in duplicate.

**Table S18. Minimal inhibitory concentration (MIC) for antibiotics in *E. coli* 25922.**

| <b>Antibiotic</b> | <b>MIC (<math>\mu</math>M)</b> |
|-------------------|--------------------------------|
| Ciprofloxacin     | 0.063 – 0.125                  |
| Rifampicin        | 2                              |
| Nisin             | >50*                           |
| Ampicillin        | 4                              |
| Polymyxin B       | 0.625 – 1.25                   |
| DPA 154           | 12.5 – 25                      |
| DPA 156           | 25 – 50                        |
| Hoechst 33258     | 12.5 – 25                      |
| Hoechst 33342     | 6.25                           |

MICs were performed in accordance to the Clinical Institute of Laboratory Standards using the broth microdilution method. \* IC<sub>50</sub>.

## References

1. Klainer, A. S. & Perkins, R. L. Surface Manifestations of Antibiotic-Induced Alterations in Protein Synthesis in Bacterial Cells. *Antimicrob. Agents Chemother.* **1**, 164-170 (1972).
2. Cushnie, T. P. T., O'Driscoll, N.,H. & Lamb, A. J. Morphological and ultrastructural changes in bacterial cells as an indicator of antibacterial mechanism of action. *Cellular and Molecular Life Sciences* **73**, 4471-4492 (2016).
3. Higgins, M. L., Daneo-Moore, L., Boothby, D. & Shockman, G. D. Effect of inhibition of deoxyribonucleic acid and protein synthesis on the direction of cell wall growth in *Streptococcus faecalis*. *J. Bacteriol.* **118**, 681-692 (1974).
4. Spratt, B. G. & Pardee, A. B. Penicillin-binding proteins and cell shape in *E. coli*. *Nature* **254**, 516-516 (1975).
5. Henrich, B., Lubitz, W. & Plapp, R. Lysis of *Escherichia coli* by induction of cloned phi X174 genes. *Mol. Gen. Genet.* **185**, 493-497 (1982).
6. Diver, J. M. & Wise, R. Morphological and biochemical changes in *Escherichia coli* after exposure to ciprofloxacin. *J. Antimicrob. Chemother.* **18**, 31-41 (1986).
7. Elliott, T. S., Shelton, A. & Greenwood, D. The response of *Escherichia coli* to ciprofloxacin and norfloxacin. *J. Med. Microbiol.* **23**, 83-88 (1987).
8. Someya, A., Tanaka, K. & Tanaka, N. Morphological changes of *Escherichia coli* induced by bicyclomycin. *Antimicrob. Agents Chemother.* **16**, 87-91 (1979).
9. Schindler, P. R. & Teuber, M. Action of polymyxin B on bacterial membranes: morphological changes in the cytoplasm and in the outer membrane of *Salmonella typhimurium* and *Escherichia coli* B. *Antimicrob. Agents Chemother.* **8**, 95-104 (1975).
10. Kohanski, M. A., Dwyer, D. J. & Collins, J. J. How antibiotics kill bacteria: from targets to networks. *Nature reviews.Microbiology* **8**, 423-435 (2010).
11. Galizzi, A., Cacco, G., Siccardi, A. G. & Mazza, G. Mode of Action of Polymyxin B: Physiological Studies with a *Bacillus subtilis*-Resistant Mutant. *Antimicrob. Agents Chemother.* **8**, 366-369 (1975).
12. Wiedemann, I. *et al.* Specific binding of nisin to the peptidoglycan precursor lipid II combines pore formation and inhibition of cell wall biosynthesis for potent antibiotic activity. *J. Biol. Chem.* **276**, 1772-1779 (2001).
13. Nonejuie, P., Burkart, M., Pogliano, K. & Pogliano, J. Bacterial cytological profiling rapidly identifies the cellular pathways targeted by antibacterial molecules. *PNAS* **110**, 16169-16174 (2013).

14. Dewar, S., Reed, L. C. & Koerner, R. J. Emerging clinical role of pivmecillinam in the treatment of urinary tract infection in the context of multidrug-resistant bacteria. *J. Antimicrob. Chemother.* **69**, 303-308 (2014).
15. Bean, G. J. *et al.* A22 disrupts the bacterial actin cytoskeleton by directly binding and inducing a low-affinity state in MreB. *Biochemistry* **48**, 4852-4857 (2009).
16. Saleh, A. M. *et al.* Synthesis and biological evaluation of new pyridone-annelated isoindigos as anti-proliferative agents. *Molecules* **19**, 13076-13092 (2014).
17. Takacs, D. *et al.* Evaluation of forty new phenothiazine derivatives for activity against intrinsic efflux pump systems of reference Escherichia coli, Salmonella Enteritidis, Enterococcus faecalis and Staphylococcus aureus strains. *In Vivo* **25**, 719-724 (2011).
18. Ribera, A., Ruiz, J., Jimenez de Anta, M. T. & Vila, J. Effect of an efflux pump inhibitor on the MIC of nalidixic acid for Acinetobacter baumannii and Stenotrophomonas maltophilia clinical isolates. *J. Antimicrob. Chemother.* **49**, 697-698 (2002).
19. Klancnik, A. *et al.* Anti-Campylobacter activity of resveratrol and an extract from waste Pinot noir grape skins and seeds, and resistance of Camp. jejuni planktonic and biofilm cells, mediated via the CmeABC efflux pump. *J. Appl. Microbiol.* **122**, 65-77 (2017).
20. Dzoyem, J. P. *et al.* Cytotoxicity, antioxidant and antibacterial activity of four compounds produced by an endophytic fungus Epicoccum nigrum associated with Entada abyssinica. *Revista Brasileira de Farmacognosia* **27**, 251-253 (2017).
21. Lamers, R. P., Cavallari, J. F. & Burrows, L. L. The efflux inhibitor phenylalanine-arginine beta-naphthylamide (PAbetaN) permeabilizes the outer membrane of gram-negative bacteria. *PLoS One* **8**, e60666 (2013).
22. Brogden, R. N., Carmine, A. A., Heel, R. C., Speight, T. M. & Avery, G. S. Trimethoprim: a review of its antibacterial activity, pharmacokinetics and therapeutic use in urinary tract infections. *Drugs* **23**, 405-430 (1982).
23. Miller, M. J. Syntheses and therapeutic potential of hydroxamic acid based siderophores and analogs. *Chem. Rev.* **89**, 1563-1579 (1989).
24. Zavascki, A. P., Goldani, L. Z., Li, J. & Nation, R. L. Polymyxin B for the treatment of multidrug-resistant pathogens: A critical review. *J. Antimicrob. Chemother.* **60**, 1206-1215 (2007).
25. Velkov, T., Thompson, P. E., Nation, R. L. & Li, J. Structure--activity relationships of polymyxin antibiotics. *J. Med. Chem.* **53**, 1898-1916 (2010).
26. Thangamani, S. *et al.* Antibacterial activity and mechanism of action of auranofin against multi-drug resistant bacterial pathogens. *Sci. Rep.* **6**, 22571 (2016).

27. Ranjan, N. *et al.* Selective Inhibition of *E. coli* RNA and DNA Topoisomerase I by Hoechst 33258 Derived Mono and Bisbenzimidazoles. *J. Med. Chem.* **60** (12), 4904-4922 (2017).
